# Supplementary material for: Long range deuterium isotope effects on 13C NMR chemical shifts of 2-alkanones in CD3OD solutions of imidazolium acetate ionic liquids
Source: Royal Society of Chemistry journal article supplement (doi:10.1039/d1ra07232c), 2021-01-01

## Supporting Information

### Long range deuterium effects on $^{13}\text{C}$ NMR chemical shifts of 2-alkanones in $\text{CD}_3\text{OD}$ solutions of imidazolium acetate ionic liquids.

Astghik A. Shahkhatuni, Aleksan G. Shahkhatuni, and Arpine S. Harutyunyan

#### $^{13}\text{C}$ NMR spectra of ketones in $\text{C}_2\text{mimOAc}/\text{CD}_3\text{OD}$

1. Methyl Isopropyl Ketone
  - a. after 1 day
  - b. after 4 days
  - c. after 6 days
  - d. after 7 weeks
2. Methyl Ethyl Ketone
  - a. after 1 day
  - b. after 2 days
  - c. after 11 days
  - d. after 6 weeks
3. Methyl Propyl Ketone
4. Methyl Butyl Ketone
5. Methyl Hexyl Ketone
6. Methyl *Tert*-Butyl Ketone
7. Acetophenone
8. Acetone

#### $^1\text{H}$ NMR spectra of ketones in $\text{C}_2\text{mimOAc}/\text{CD}_3\text{OD}$

1. Methyl Isopropyl Ketone in  $\text{C}_2\text{mimOAc}/\text{CD}_3\text{OD}$
2. Methyl Ethyl Ketone in  $\text{C}_2\text{mimOAc}/\text{CD}_3\text{OD}$
3. Methyl Propyl Ketone in  $\text{C}_2\text{mimOAc}/\text{CD}_3\text{OD}$
4. Methyl Butyl Ketone in  $\text{C}_2\text{mimOAc}/\text{CD}_3\text{OD}$
5. Methyl Hexyl Ketone in  $\text{C}_2\text{mimOAc}/\text{CD}_3\text{OD}$

$^{13}\text{C}$  NMR, Methyl Isopropyl Ketone in  $\text{C}_2\text{mimOAc}/\text{CD}_3\text{OD}$ , after 1 day

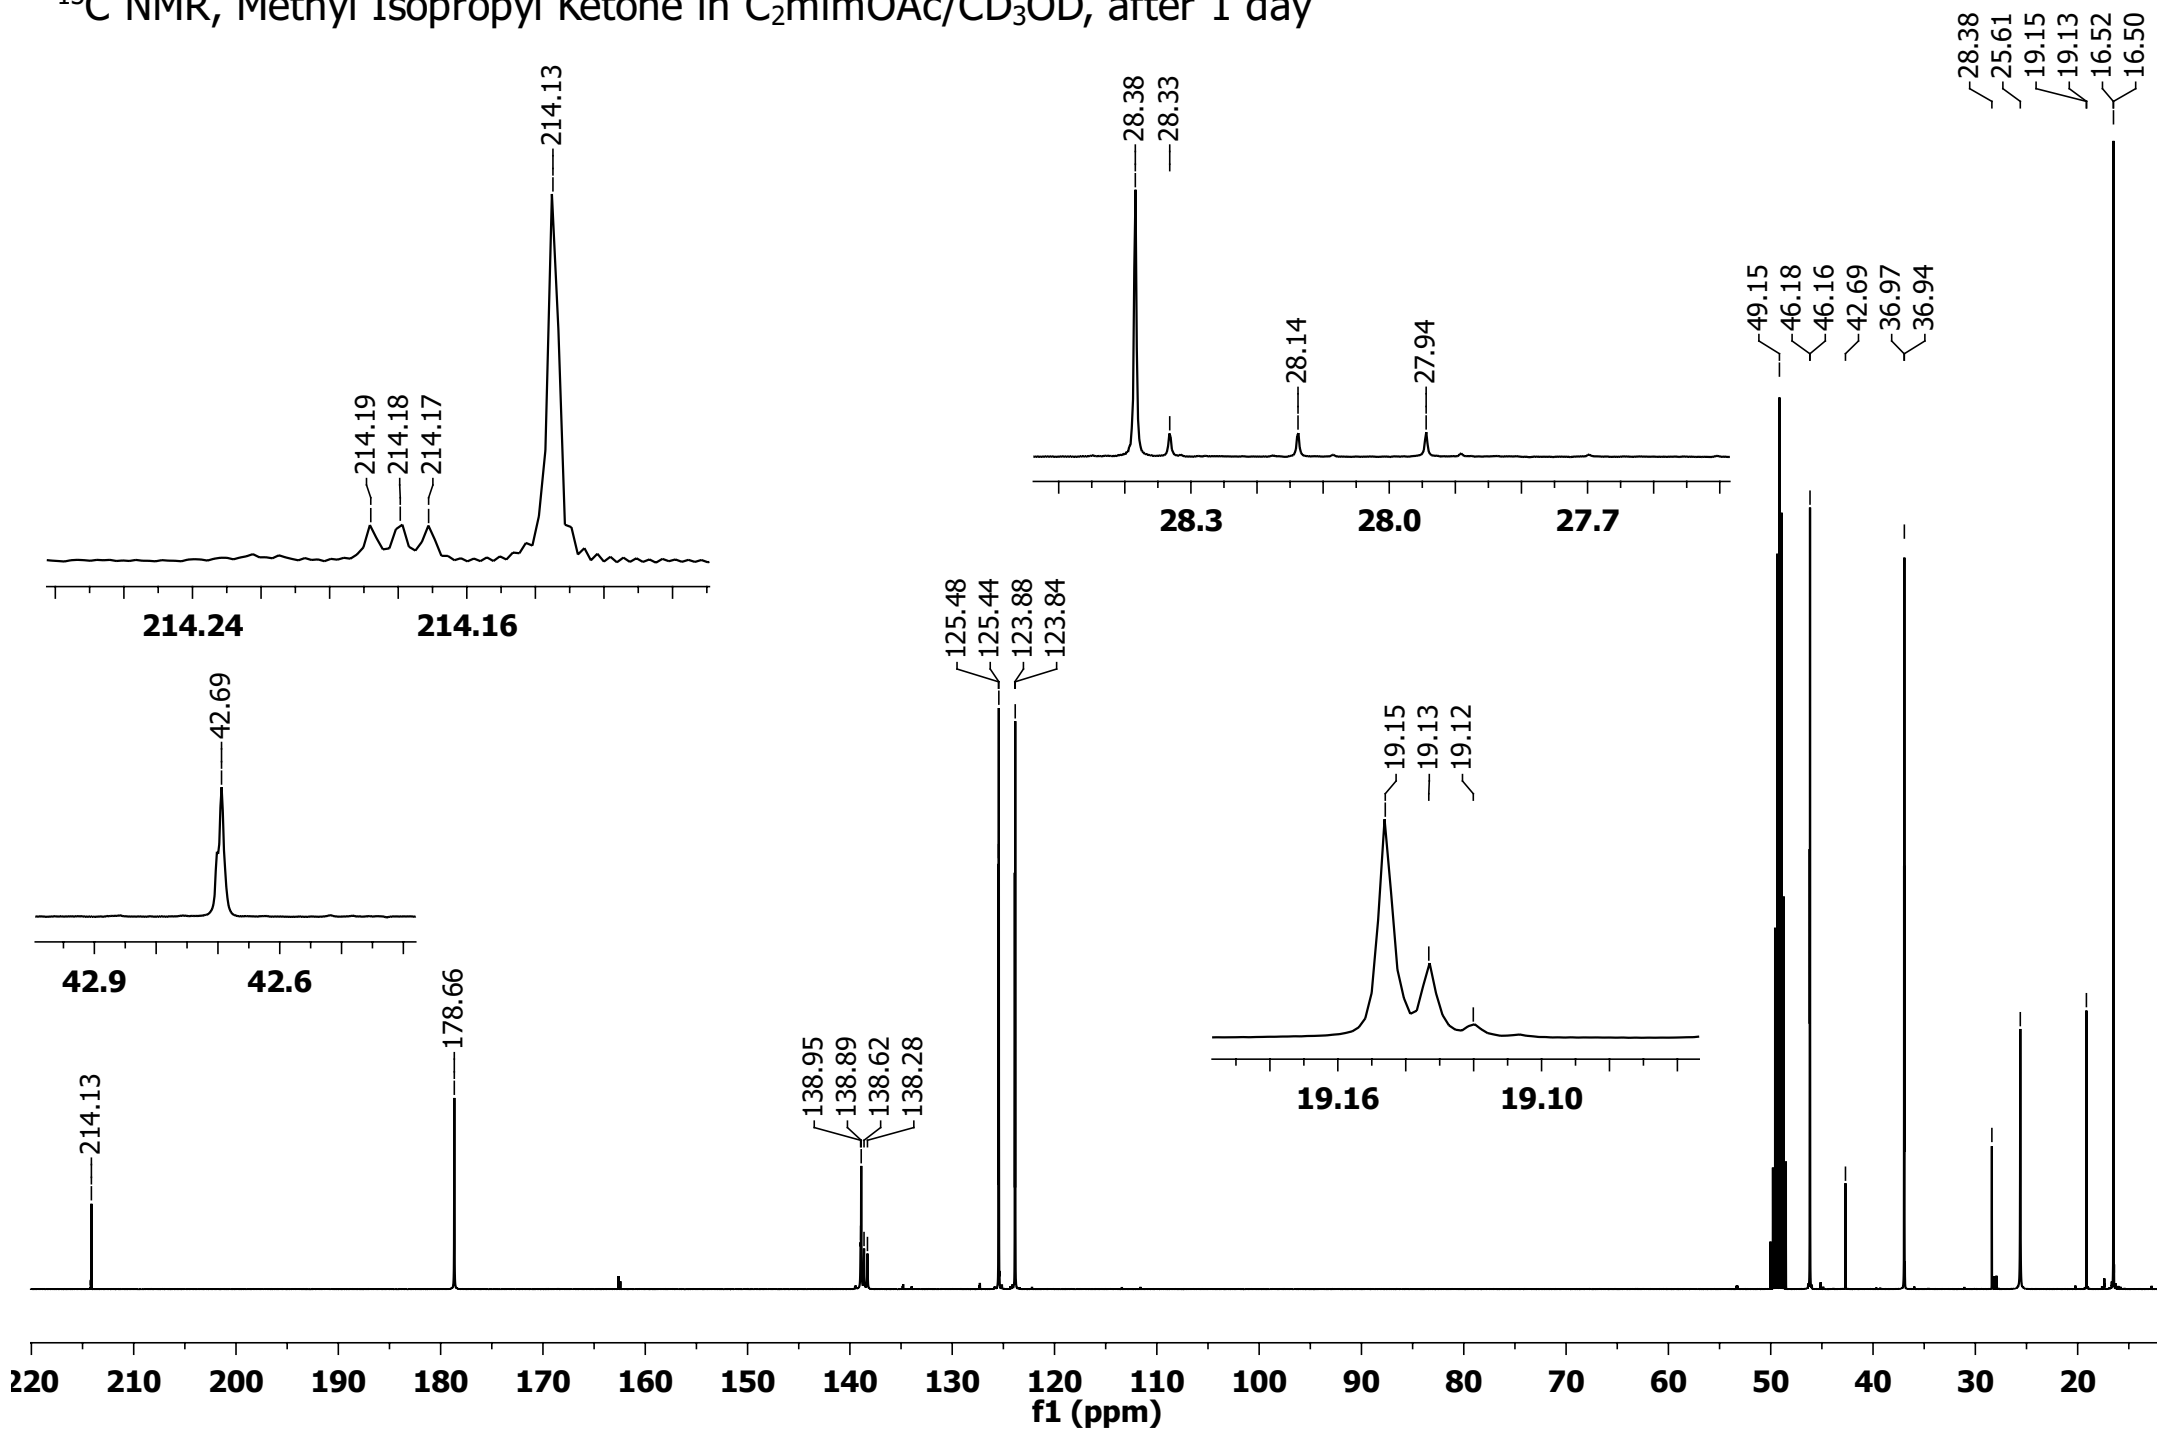

<sup>13</sup>C NMR, Methyl Isopropyl Ketone in C<sub>2</sub>mimOAc/CD<sub>3</sub>OD, after 4 days

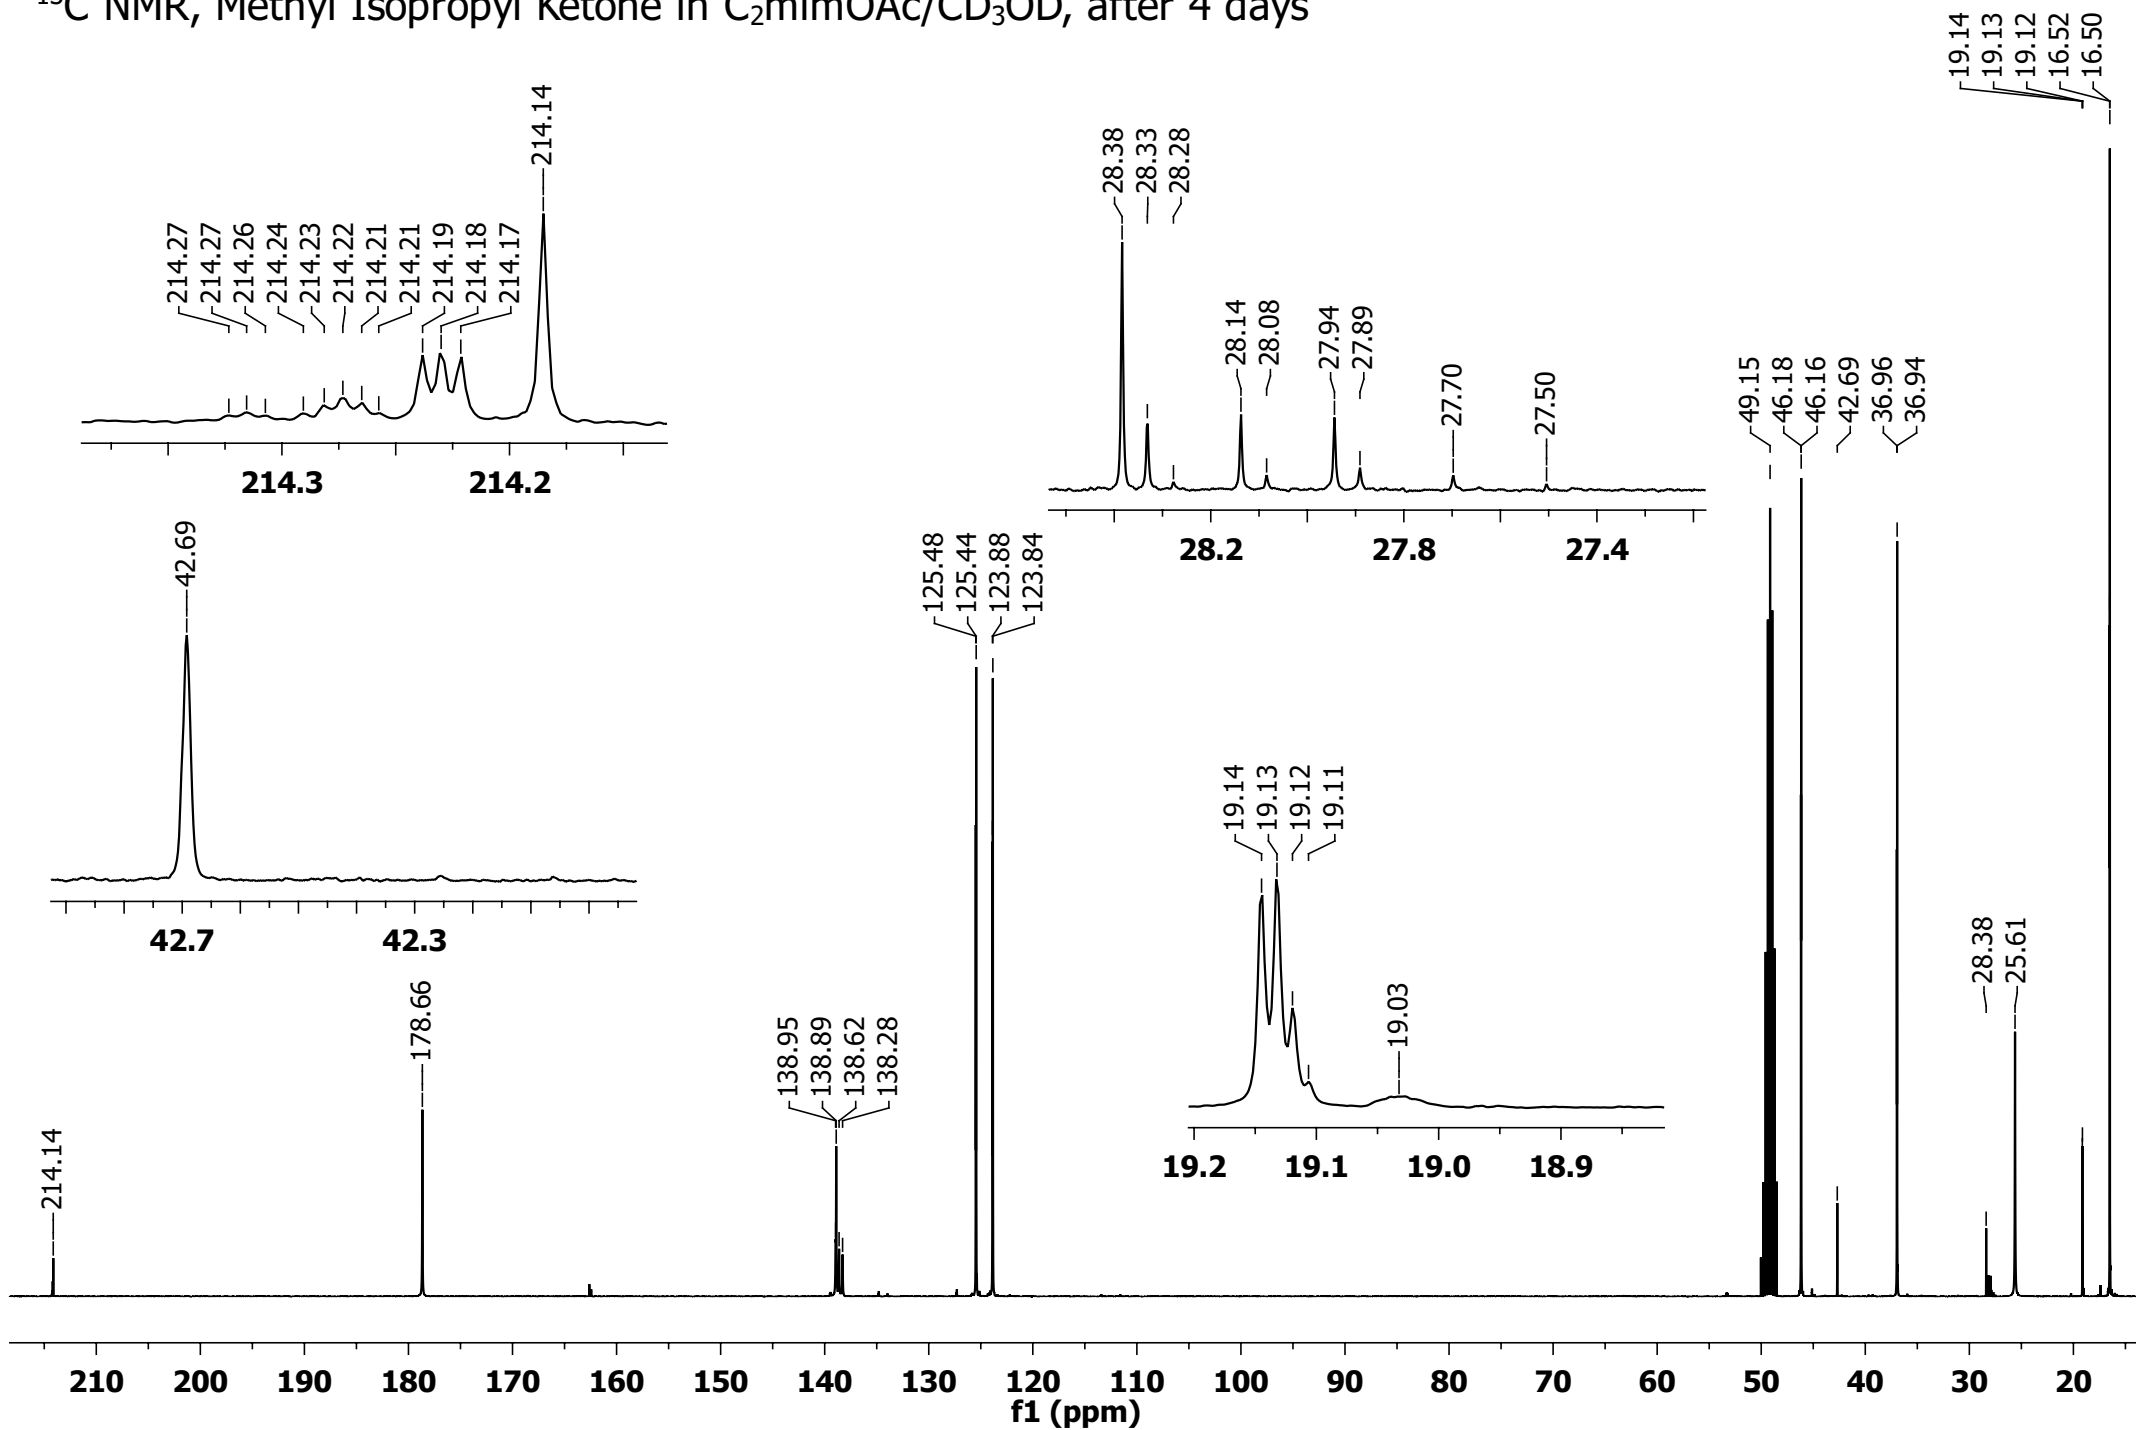

<sup>13</sup>C NMR, Methyl Isopropyl Ketone in C<sub>2</sub>mimOAc/CD<sub>3</sub>OD, after 6 days

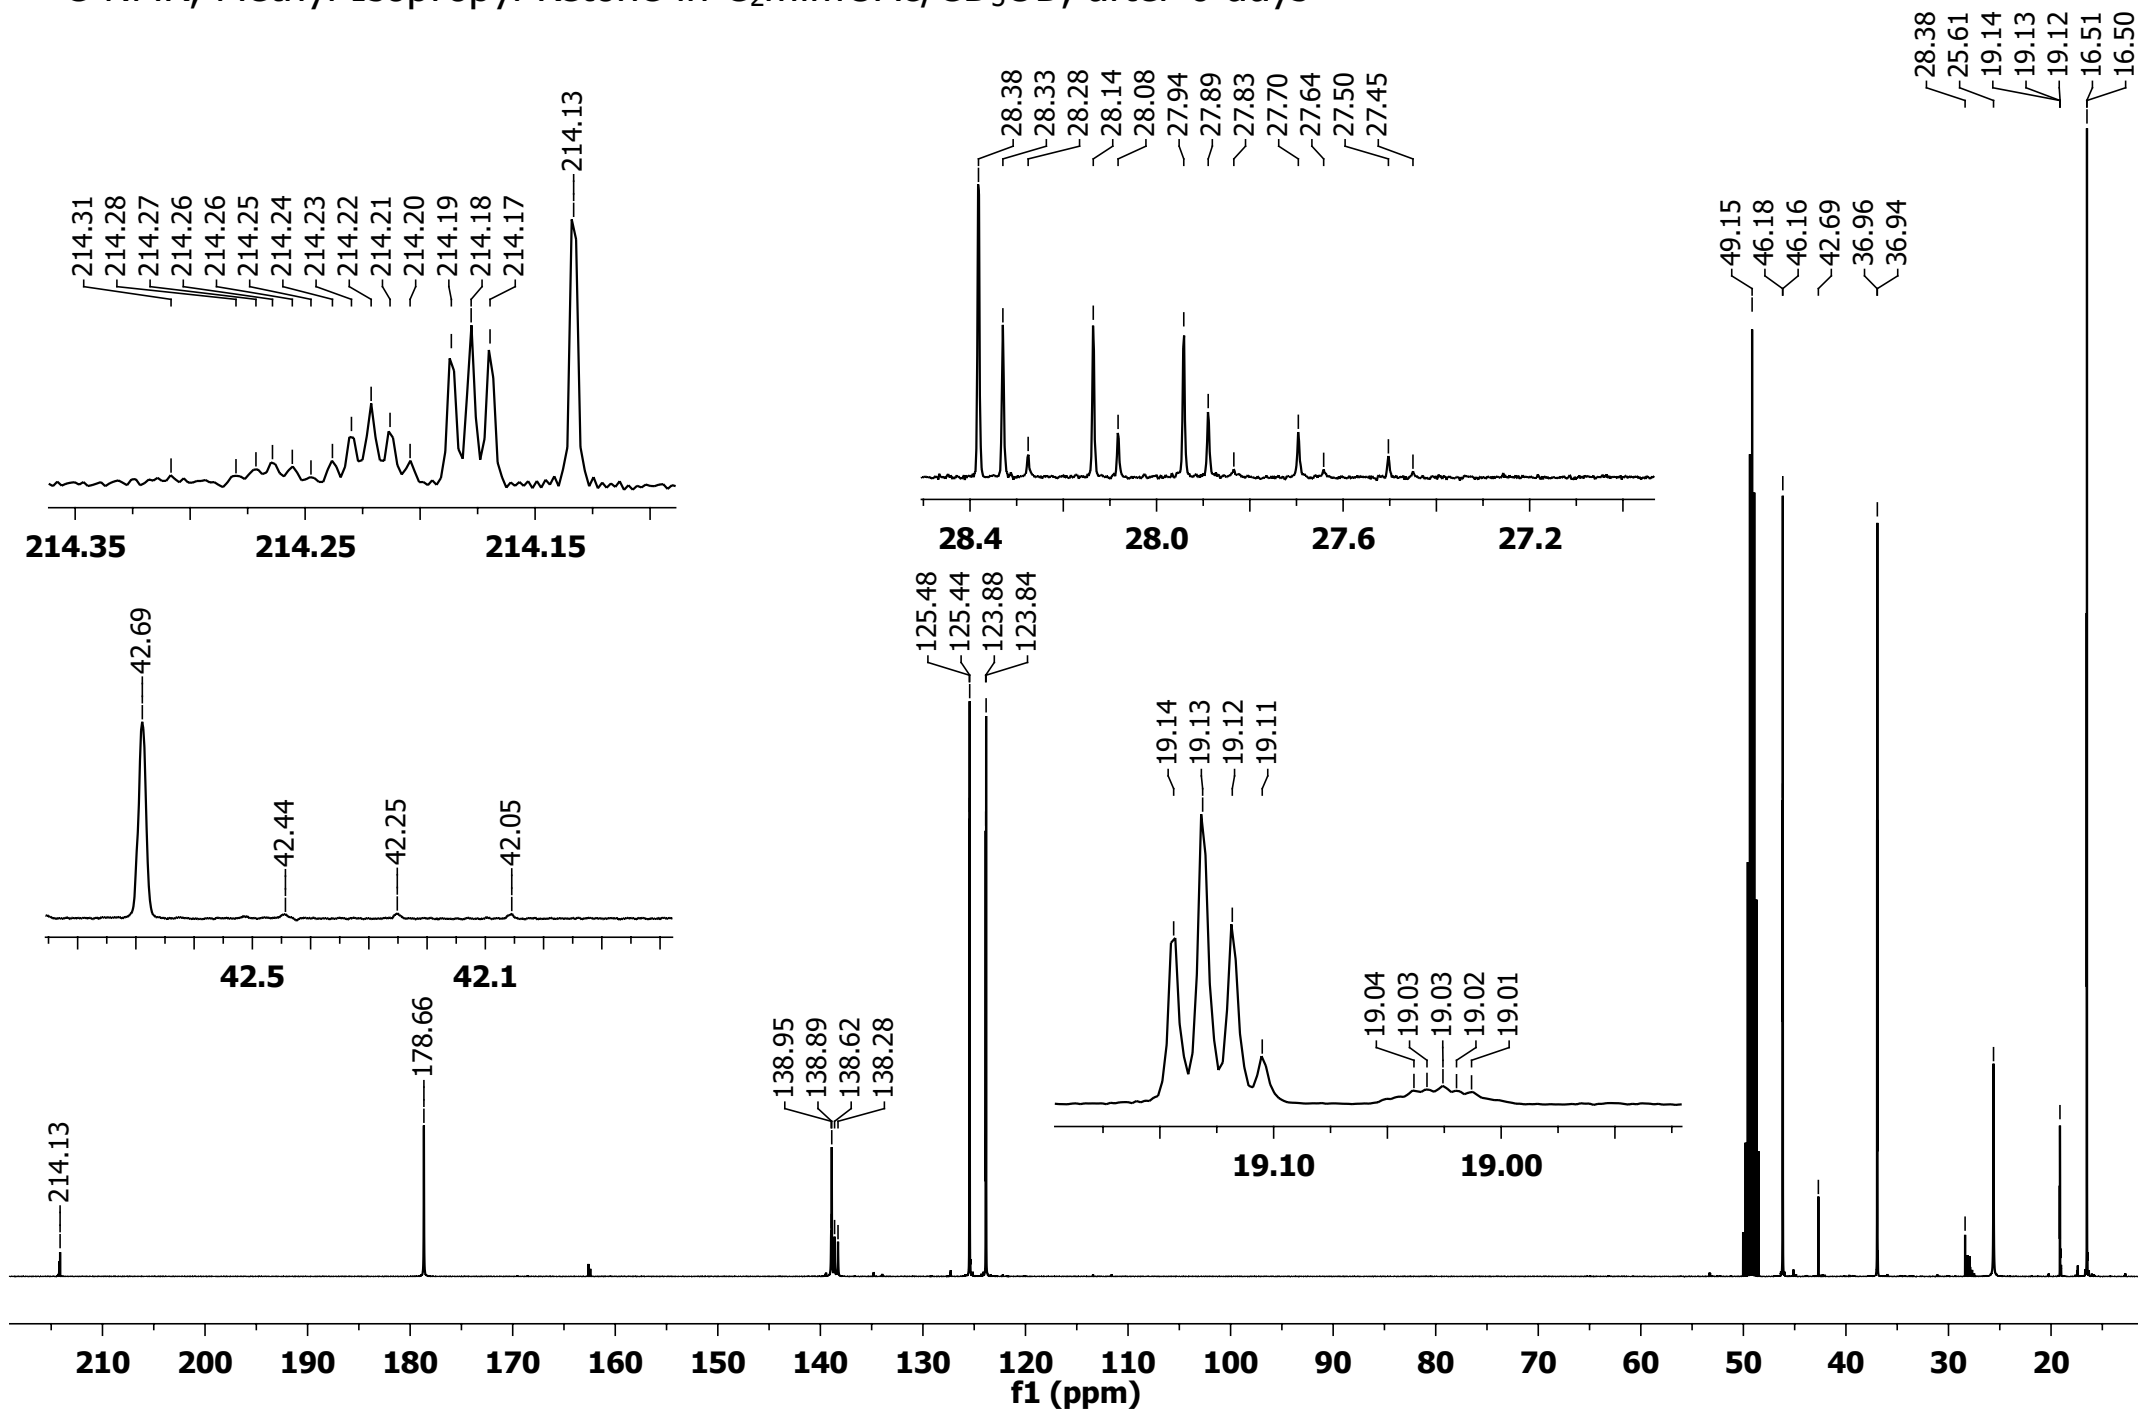

# Methyl isopropyl ketone in C2mimOAC/CD3OD, after 7 weeks

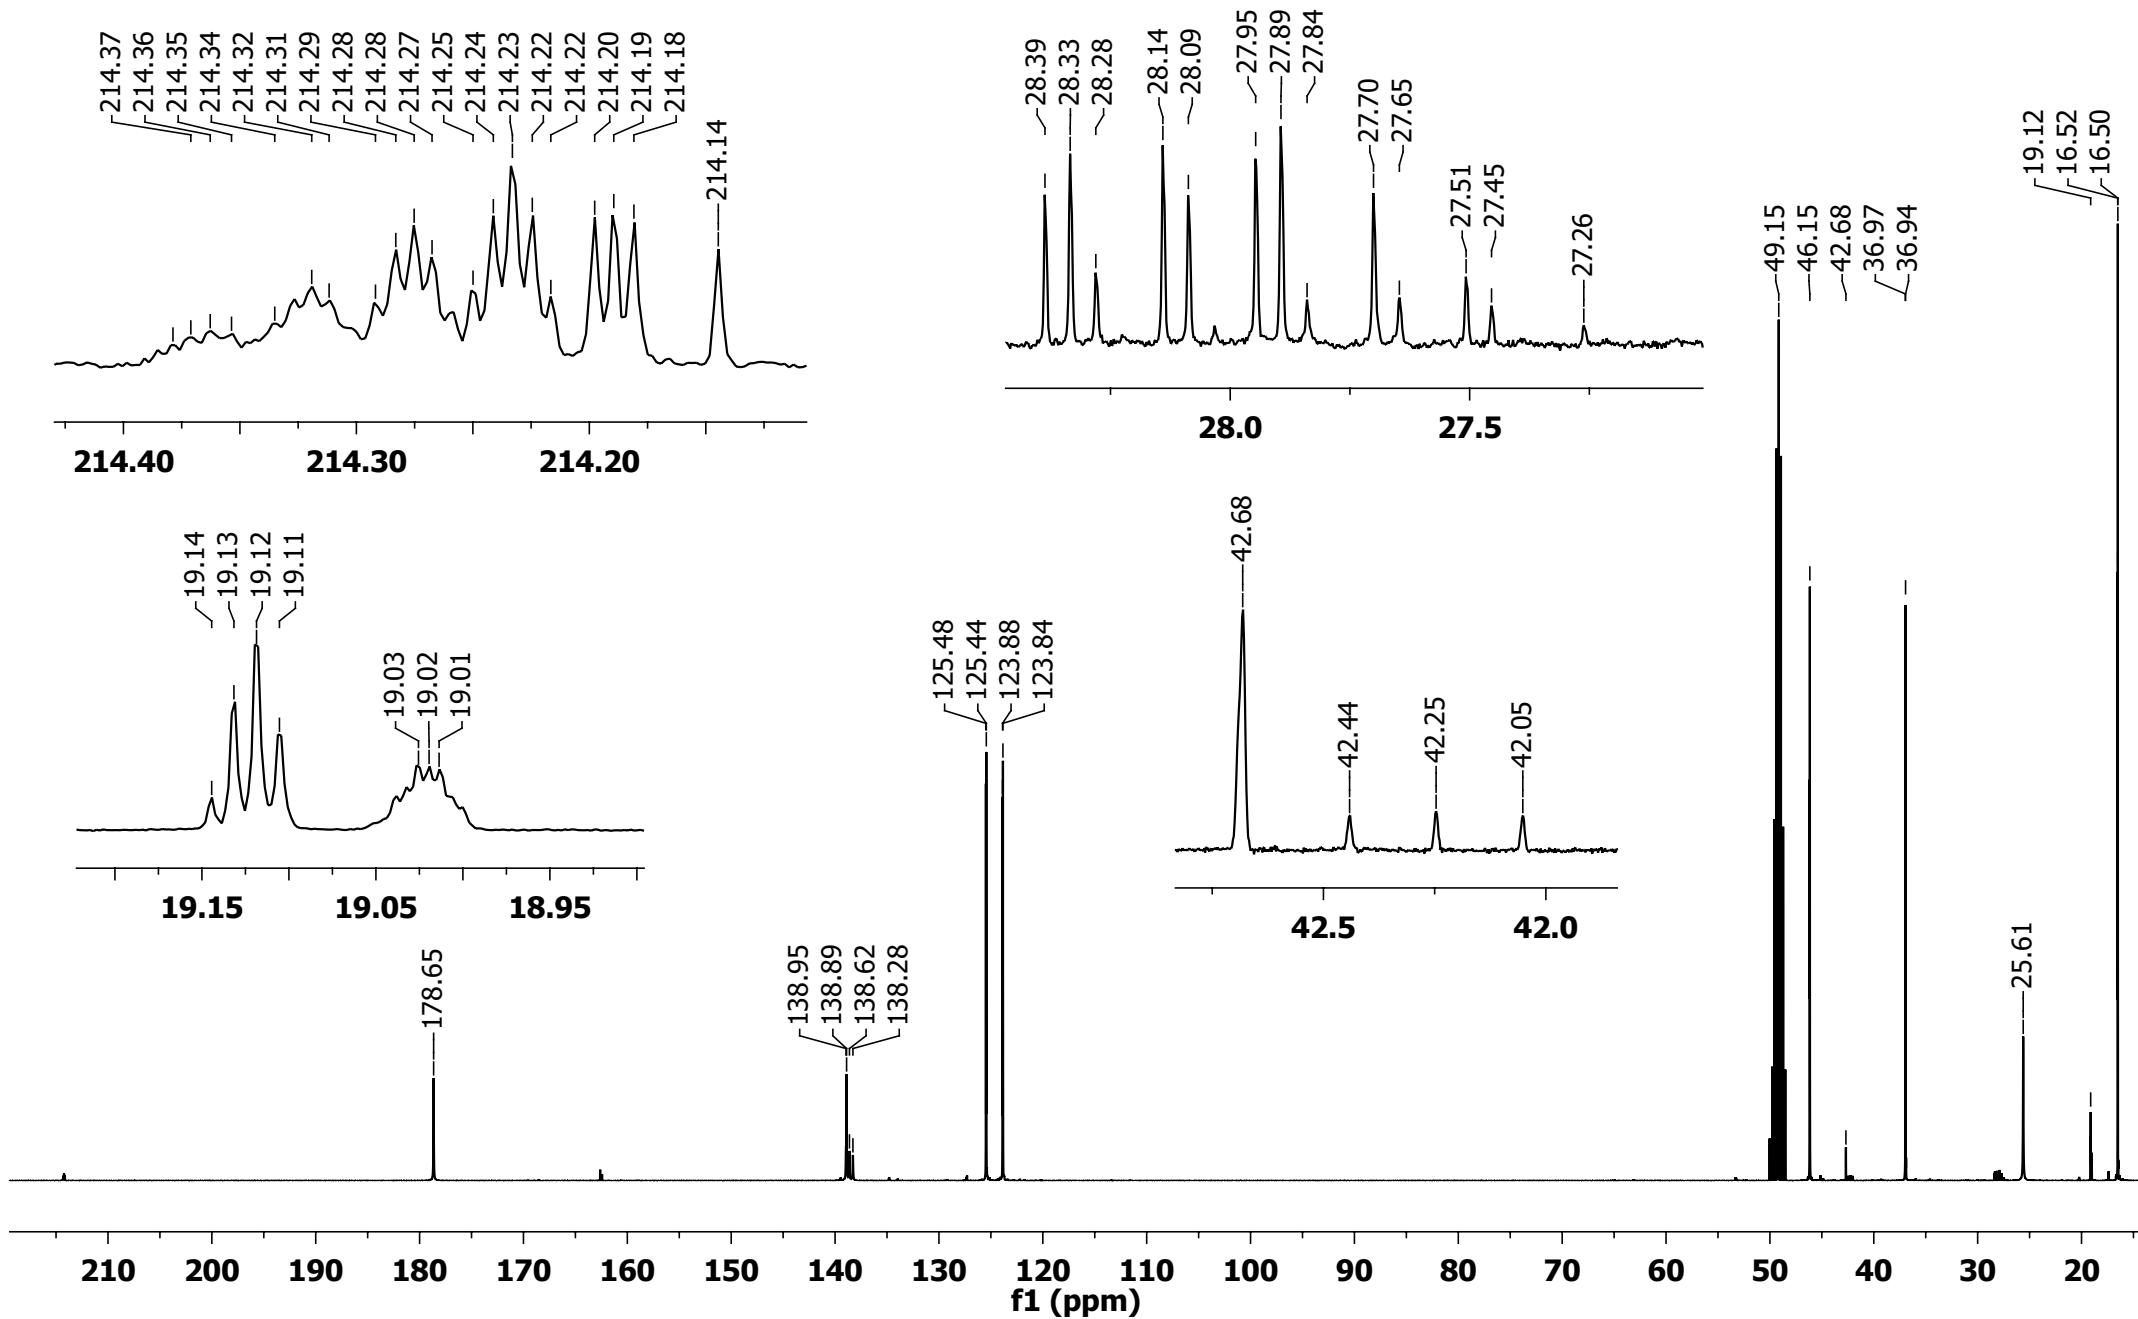

<sup>13</sup>C NMR, Methyl ethyl ketone in C<sub>2</sub>mimOAc/CD<sub>3</sub>OD, after 1 day

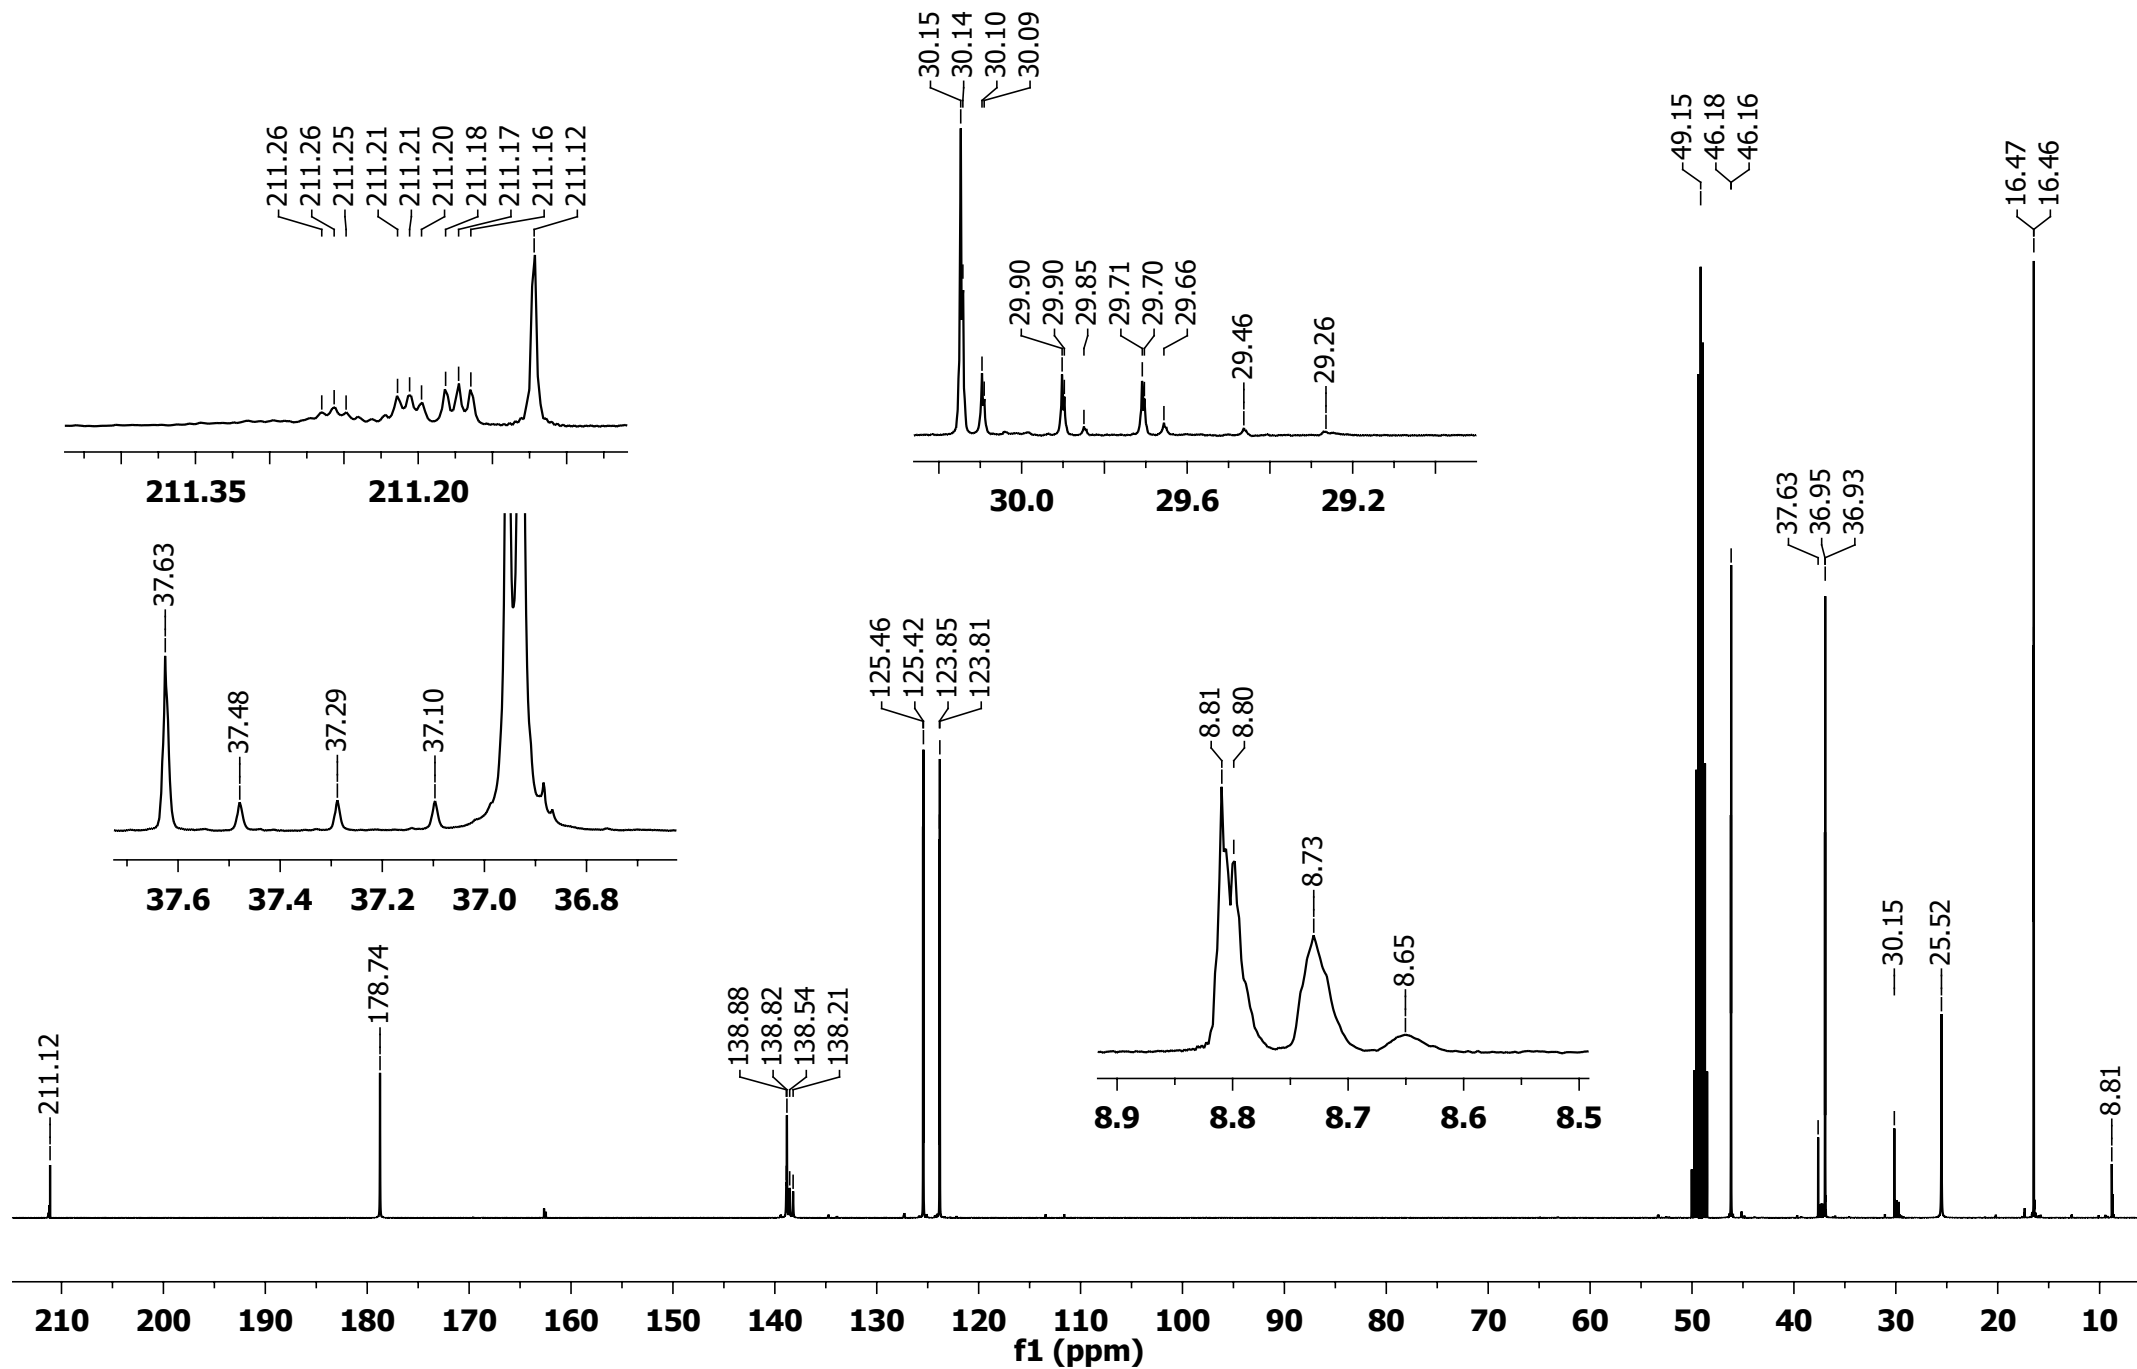

<sup>13</sup>C NMR, Methyl ethyl ketone in C<sub>2</sub>mimOAc/CD<sub>3</sub>OD, after 2 days



<sup>13</sup>C NMR, Methyl ethyl ketone in C<sub>2</sub>mimOAc/CD<sub>3</sub>OD, after 11

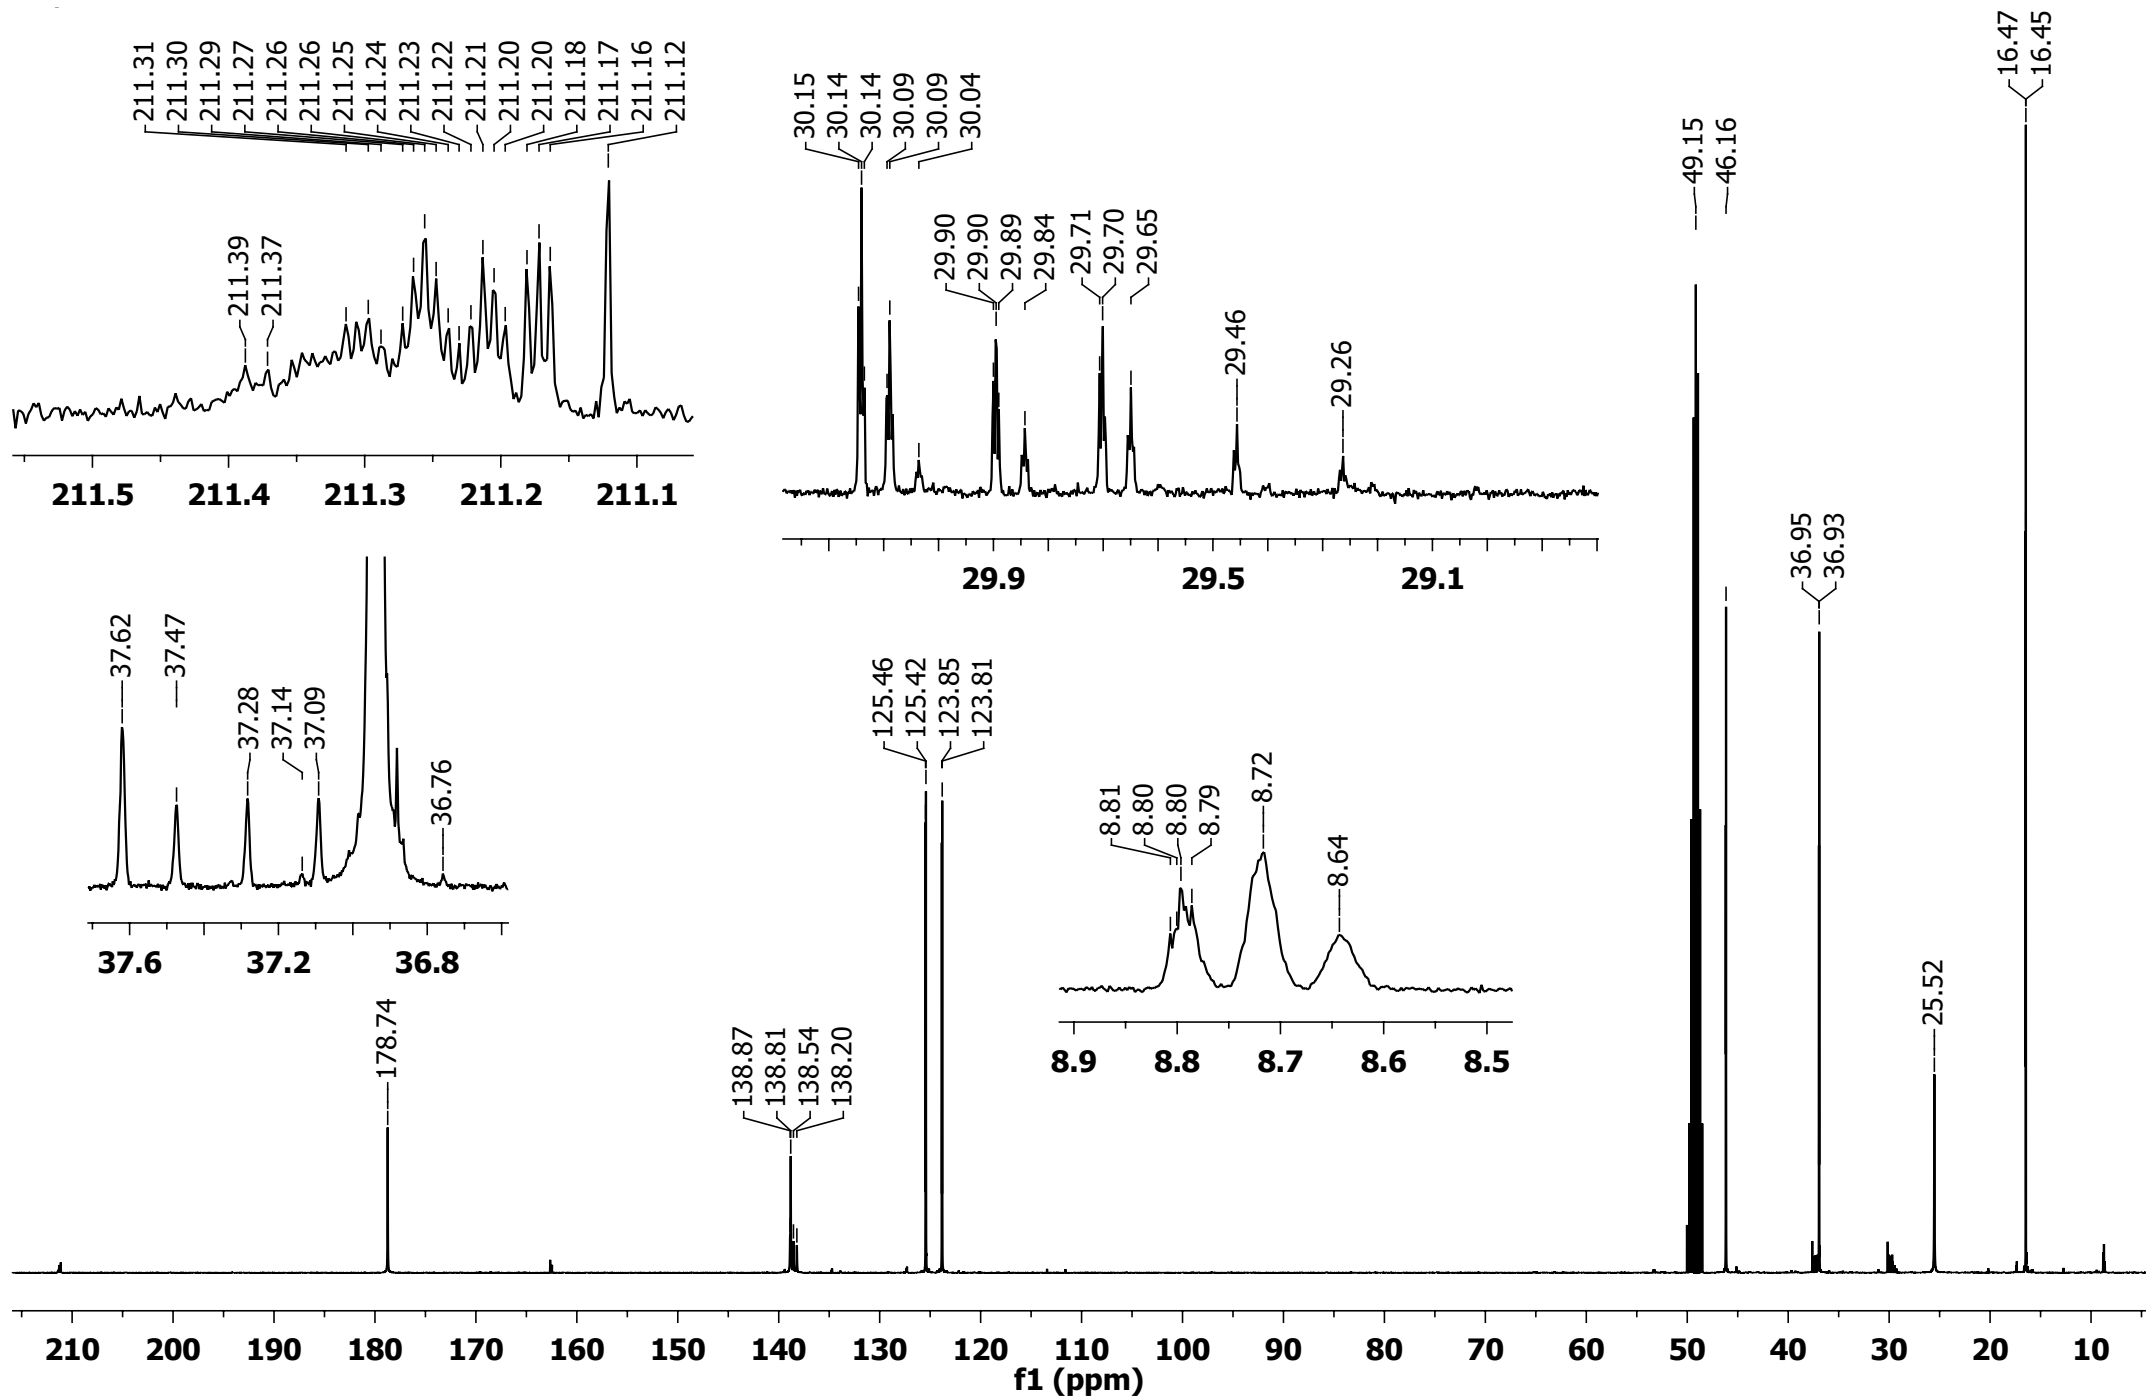



$^{13}\text{C}$  NMR, Methyl ethyl ketone in  $\text{C}_2\text{mimOAc}/\text{CD}_3\text{OD}$ , after 6 weeks

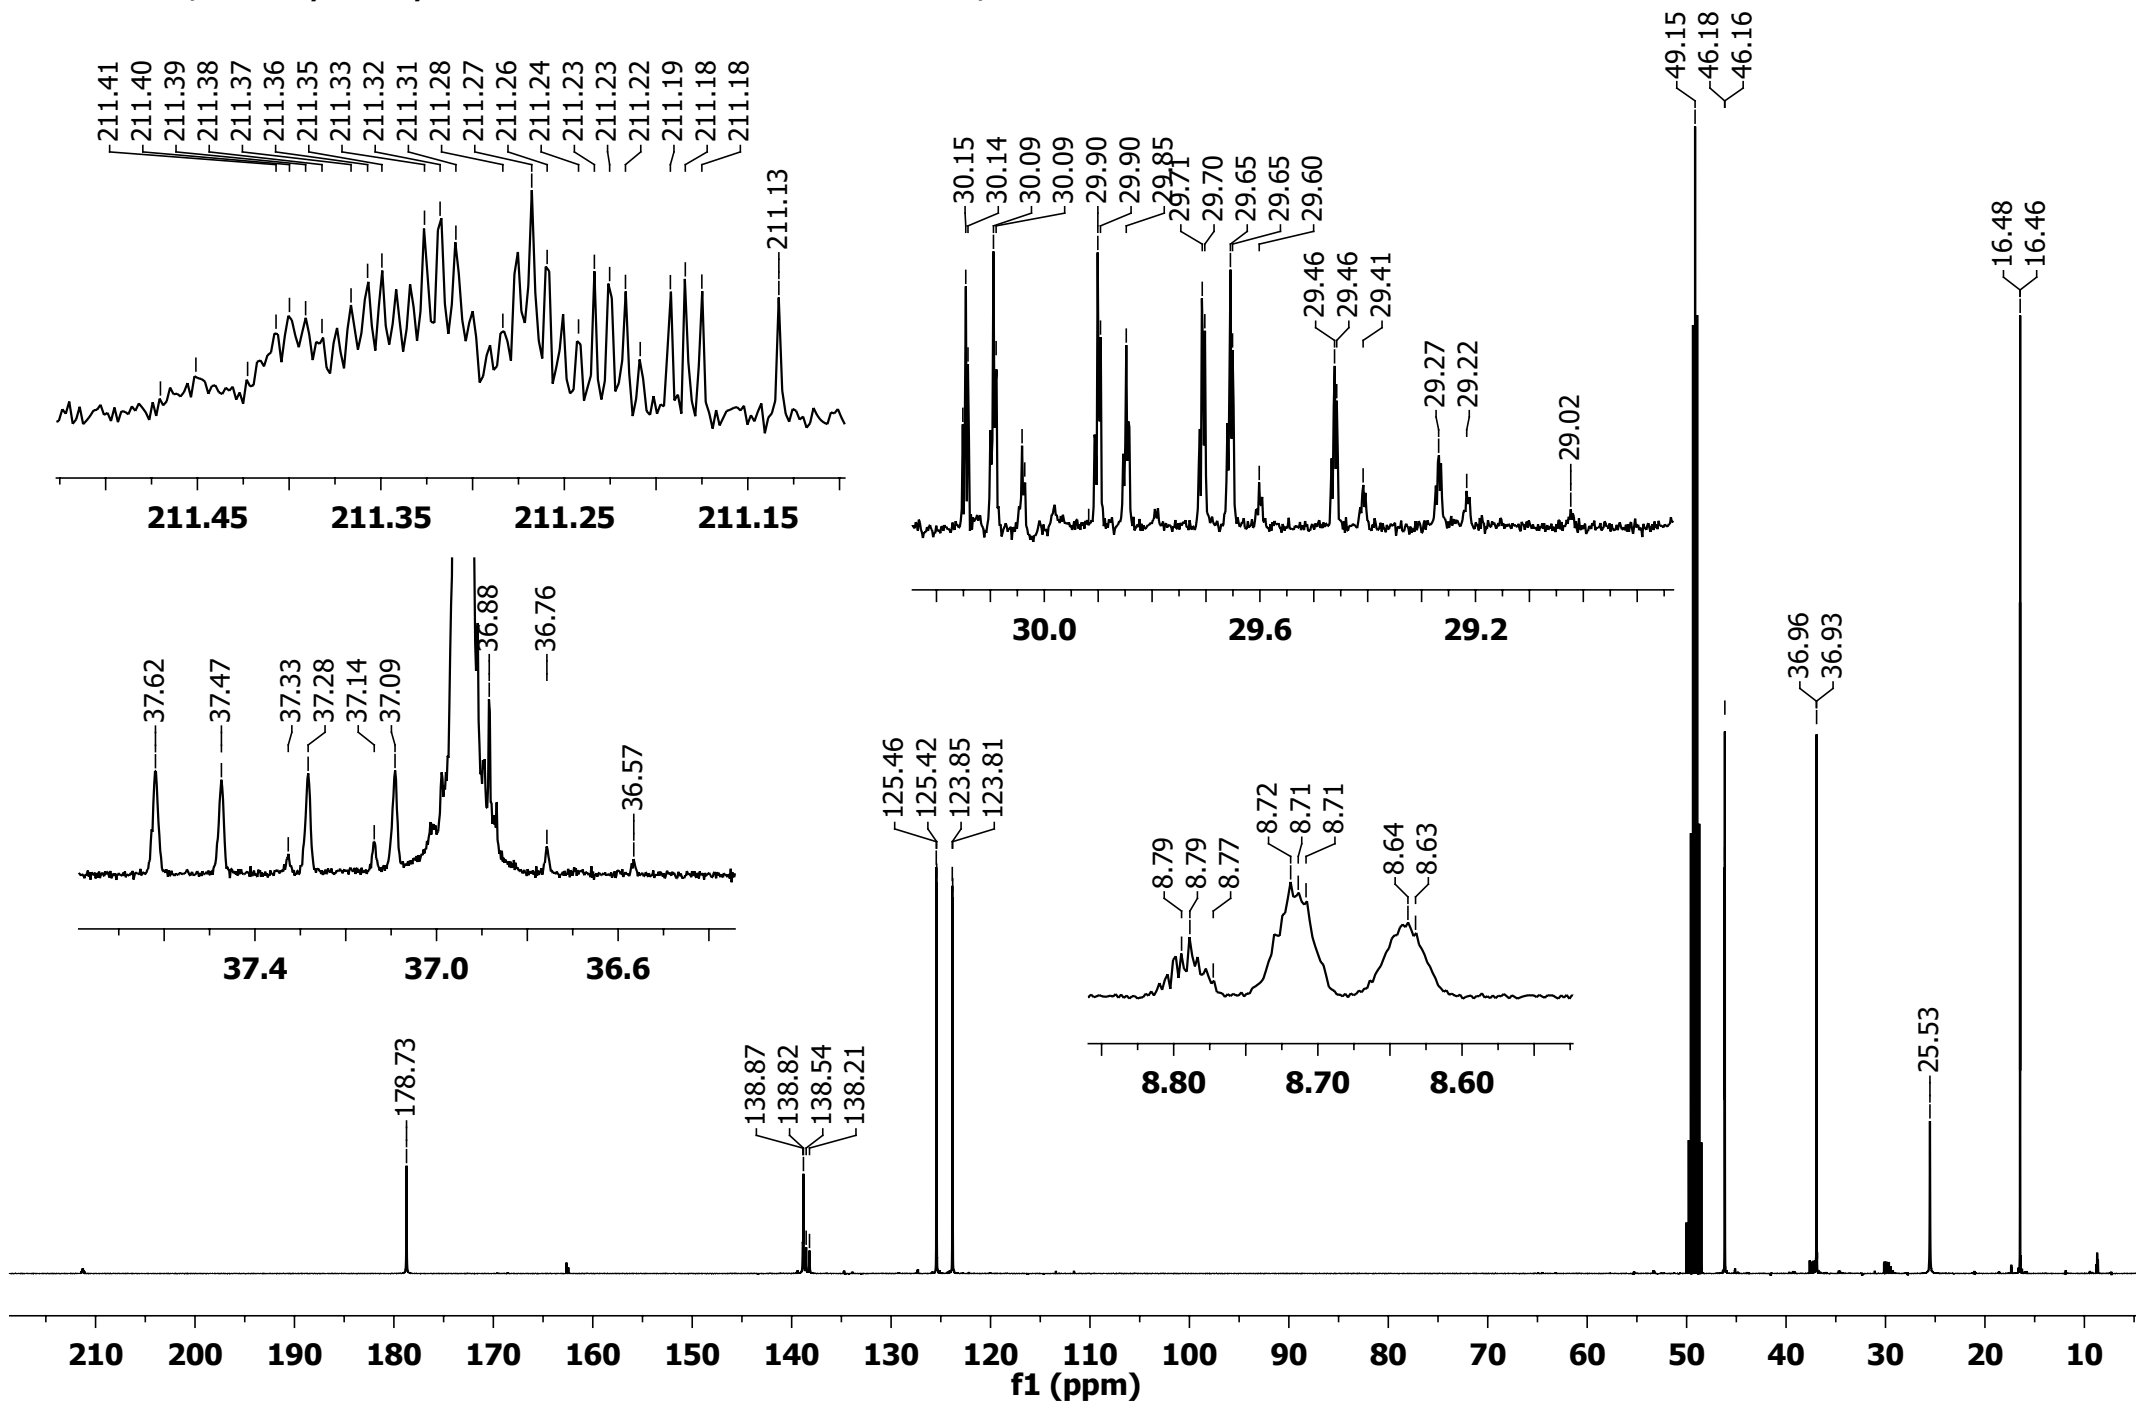

<sup>13</sup>C NMR, Methyl Propyl Ketone in C<sub>2</sub>mimOAc/CD<sub>3</sub>OD, after 7 weeks

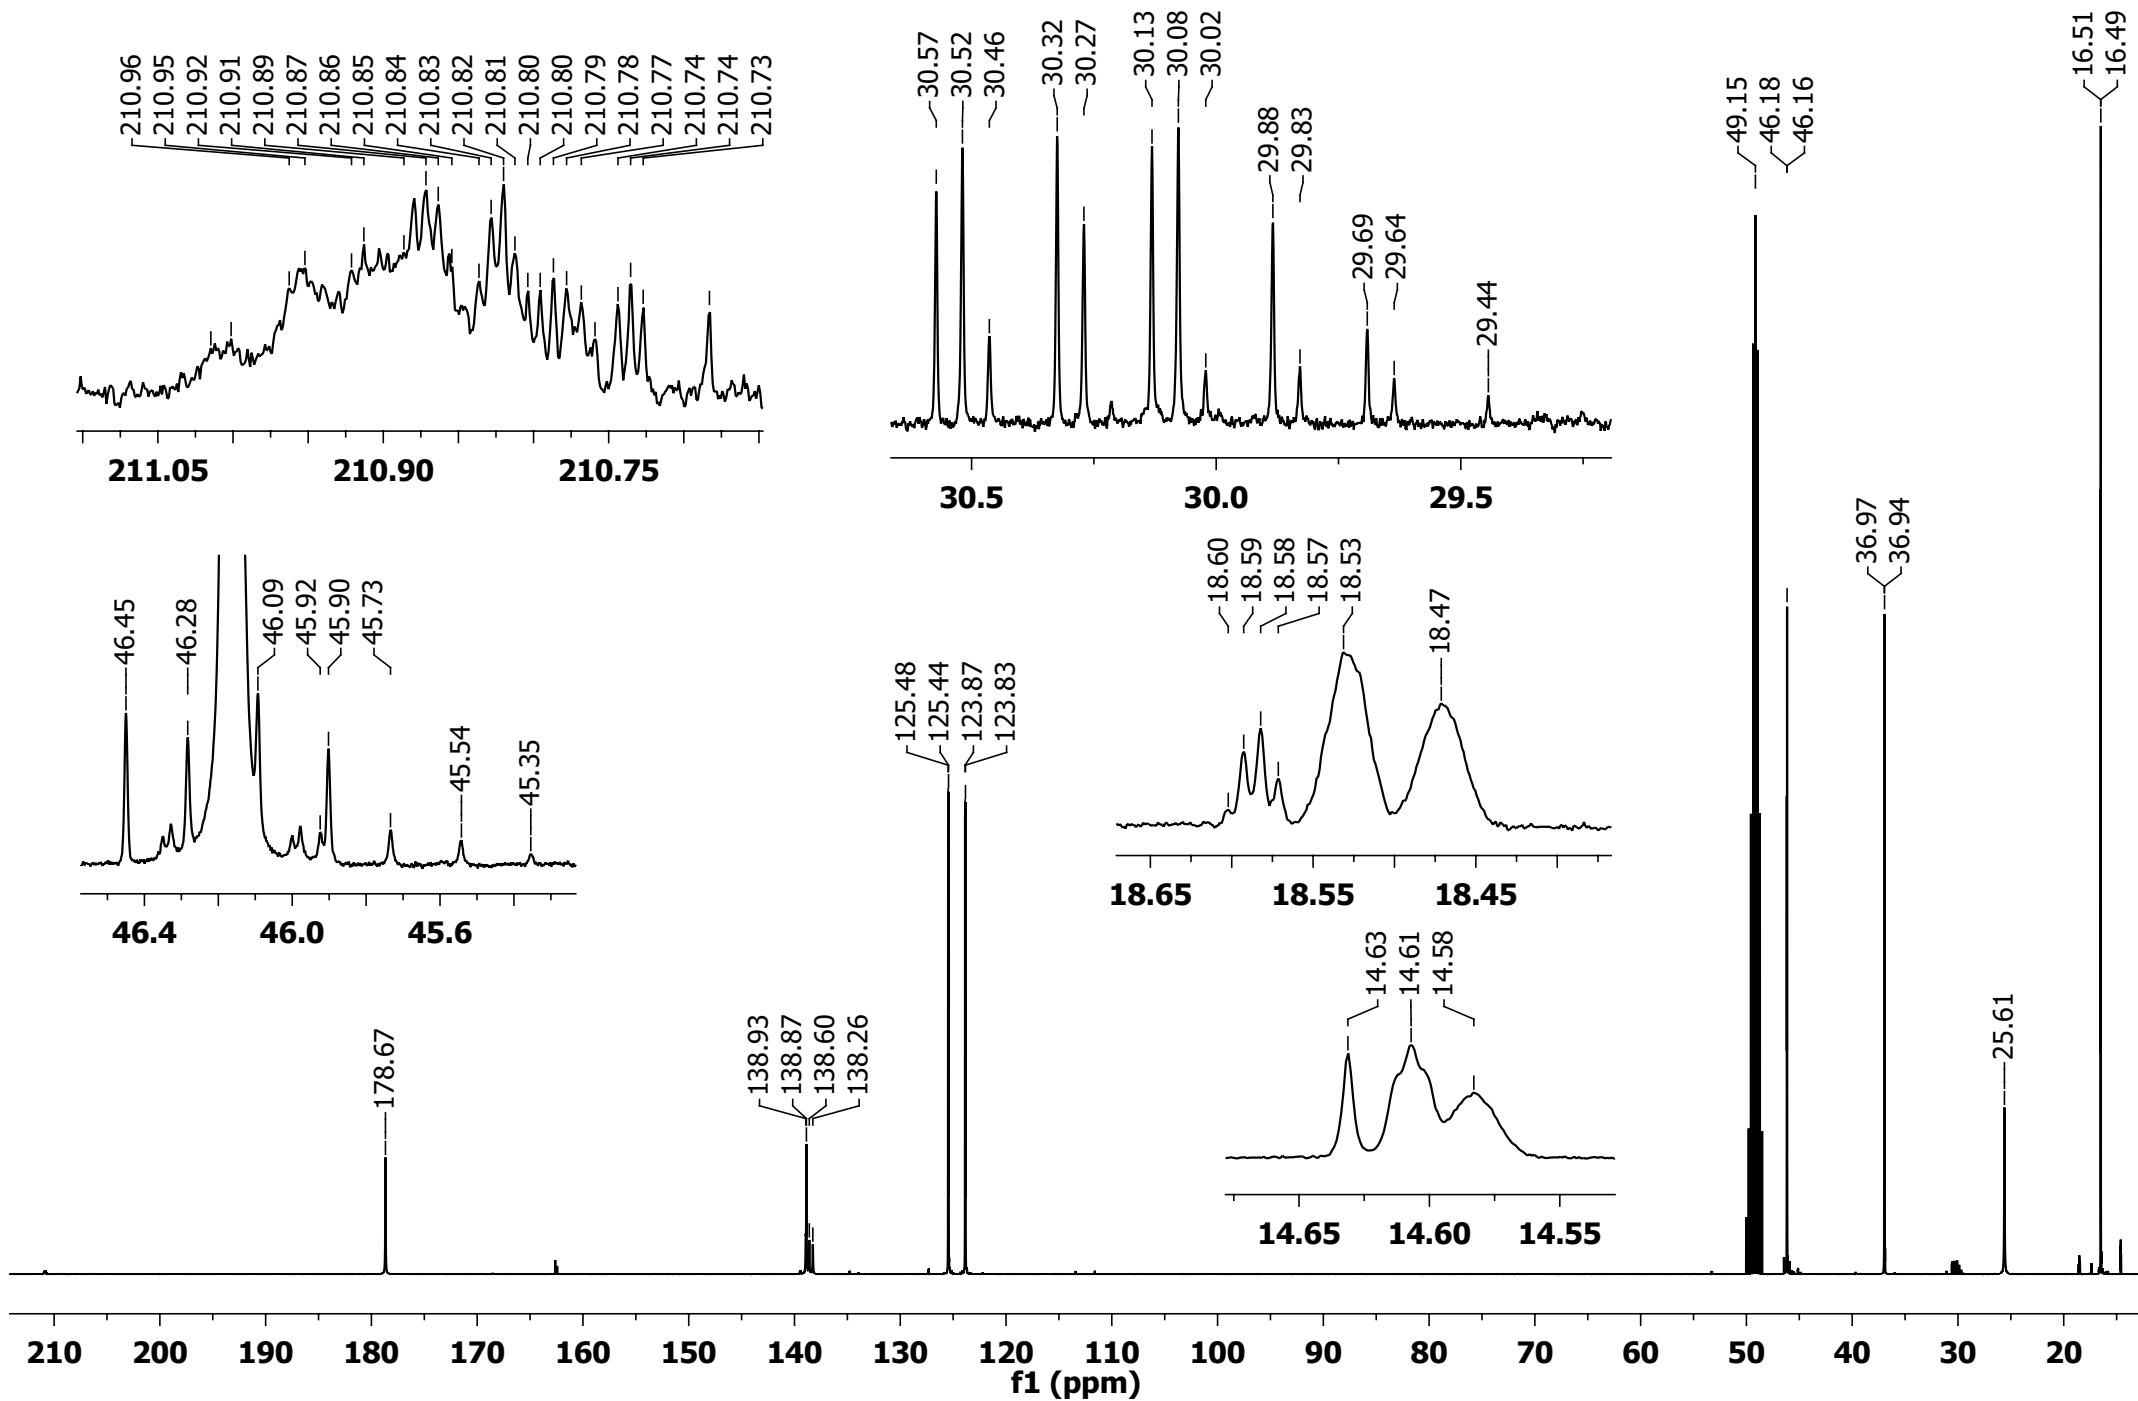

<sup>13</sup>C NMR, Methyl Butyl Ketone in C<sub>2</sub>mimOAc/CD<sub>3</sub>OD, after 7 weeks

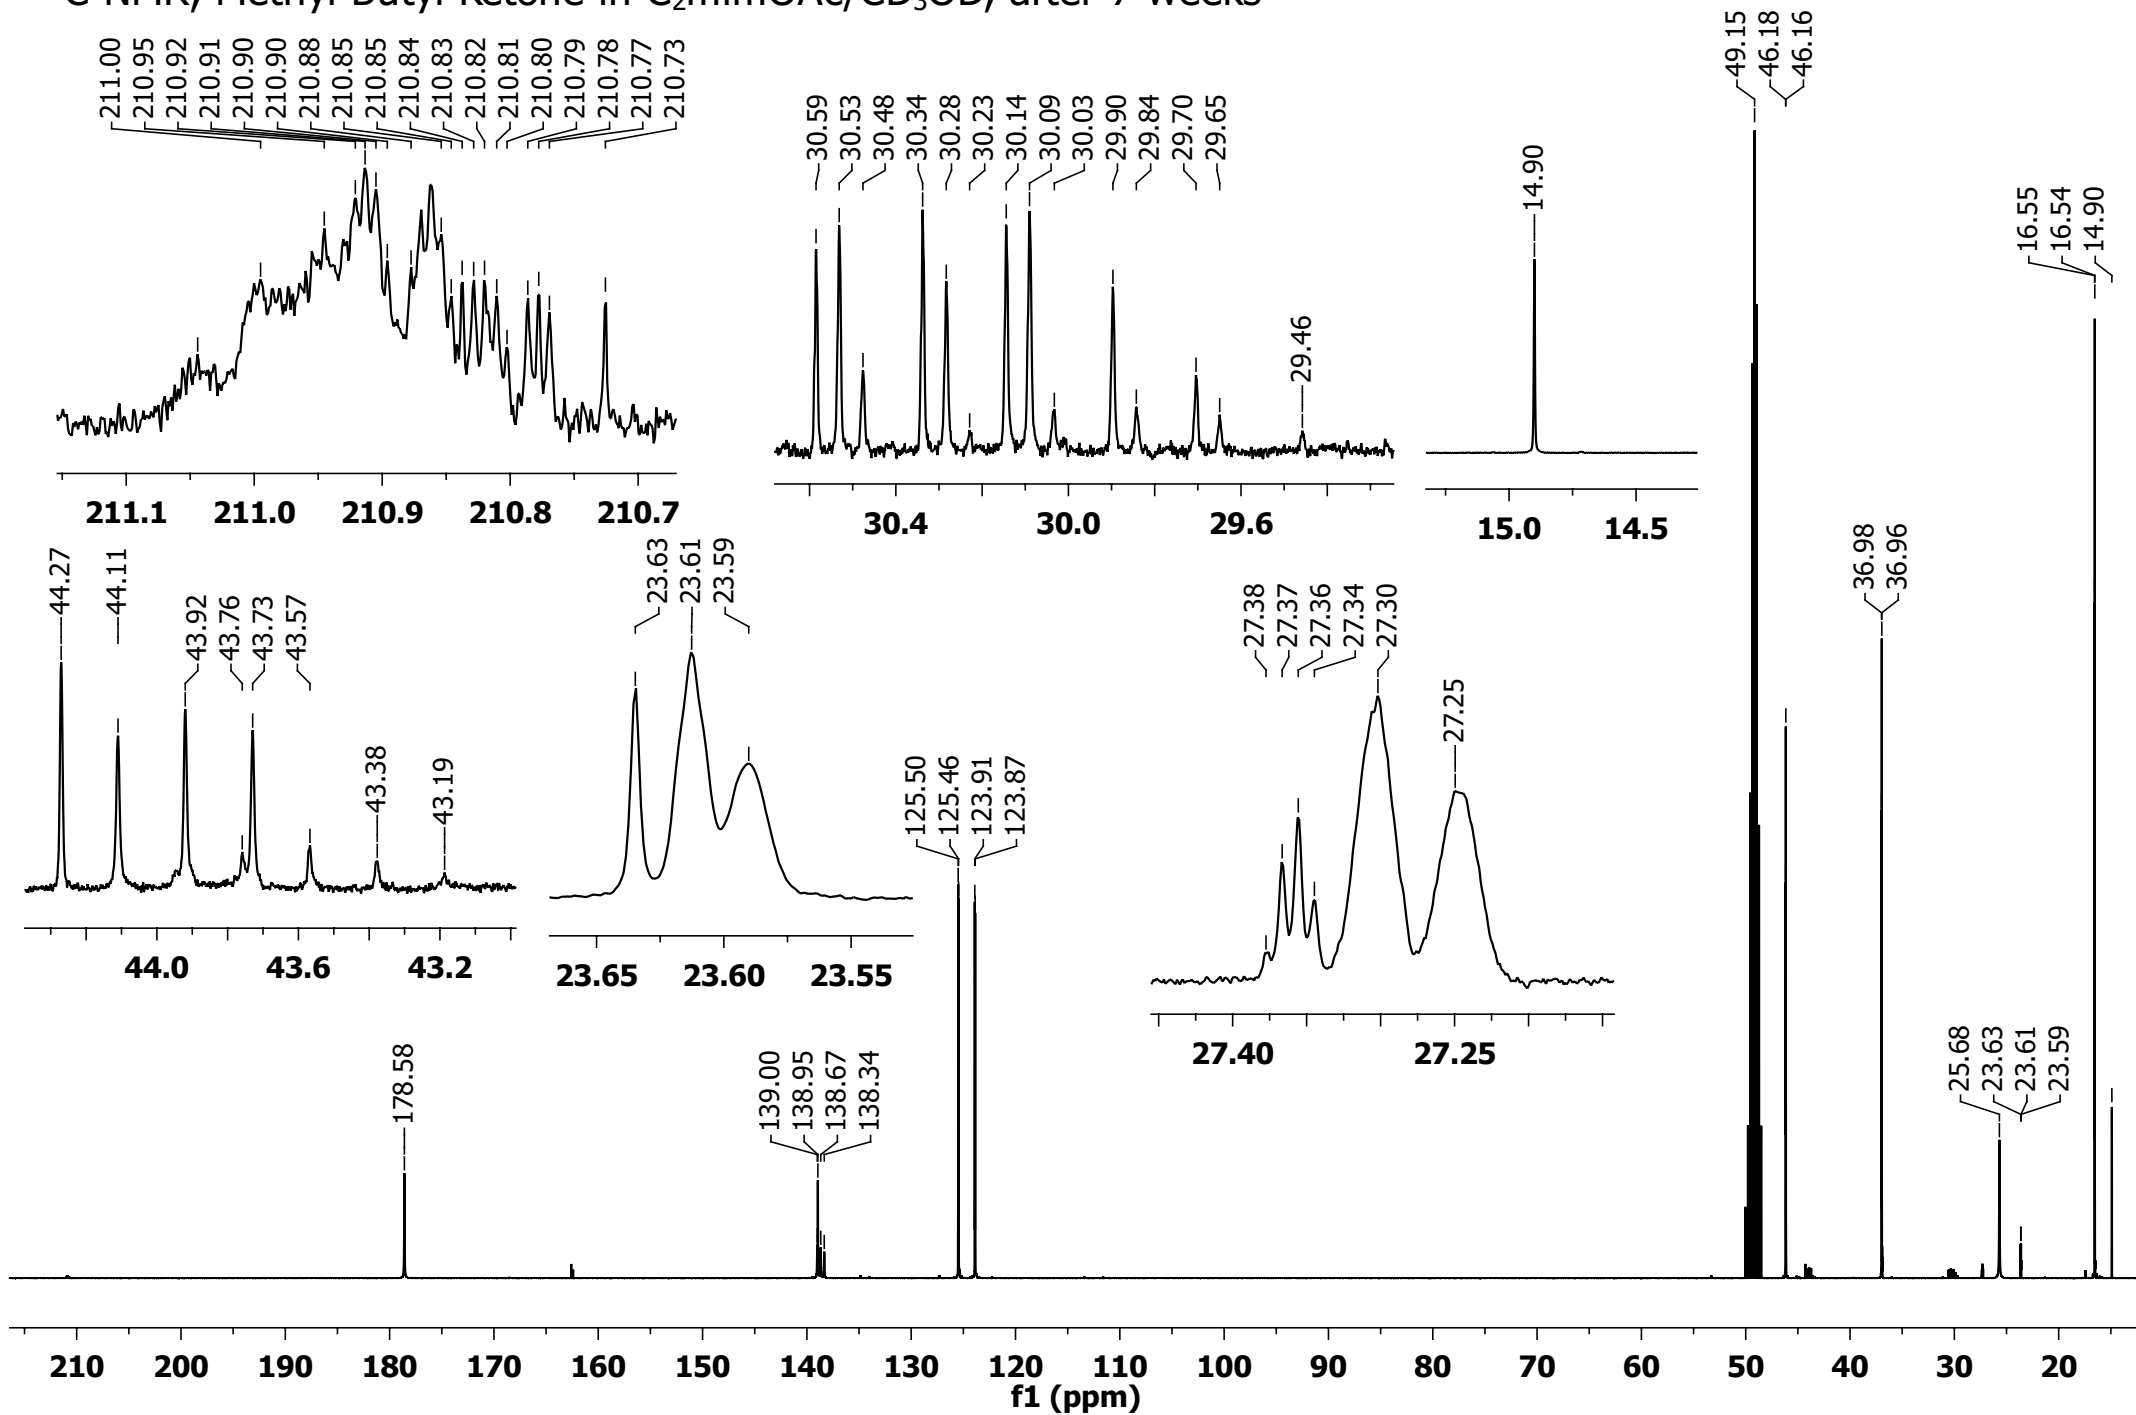

<sup>13</sup>C NMR, Methyl Hexyl Ketone in C<sub>2</sub>mimOAc/CD<sub>3</sub>OD, after 7 weeks

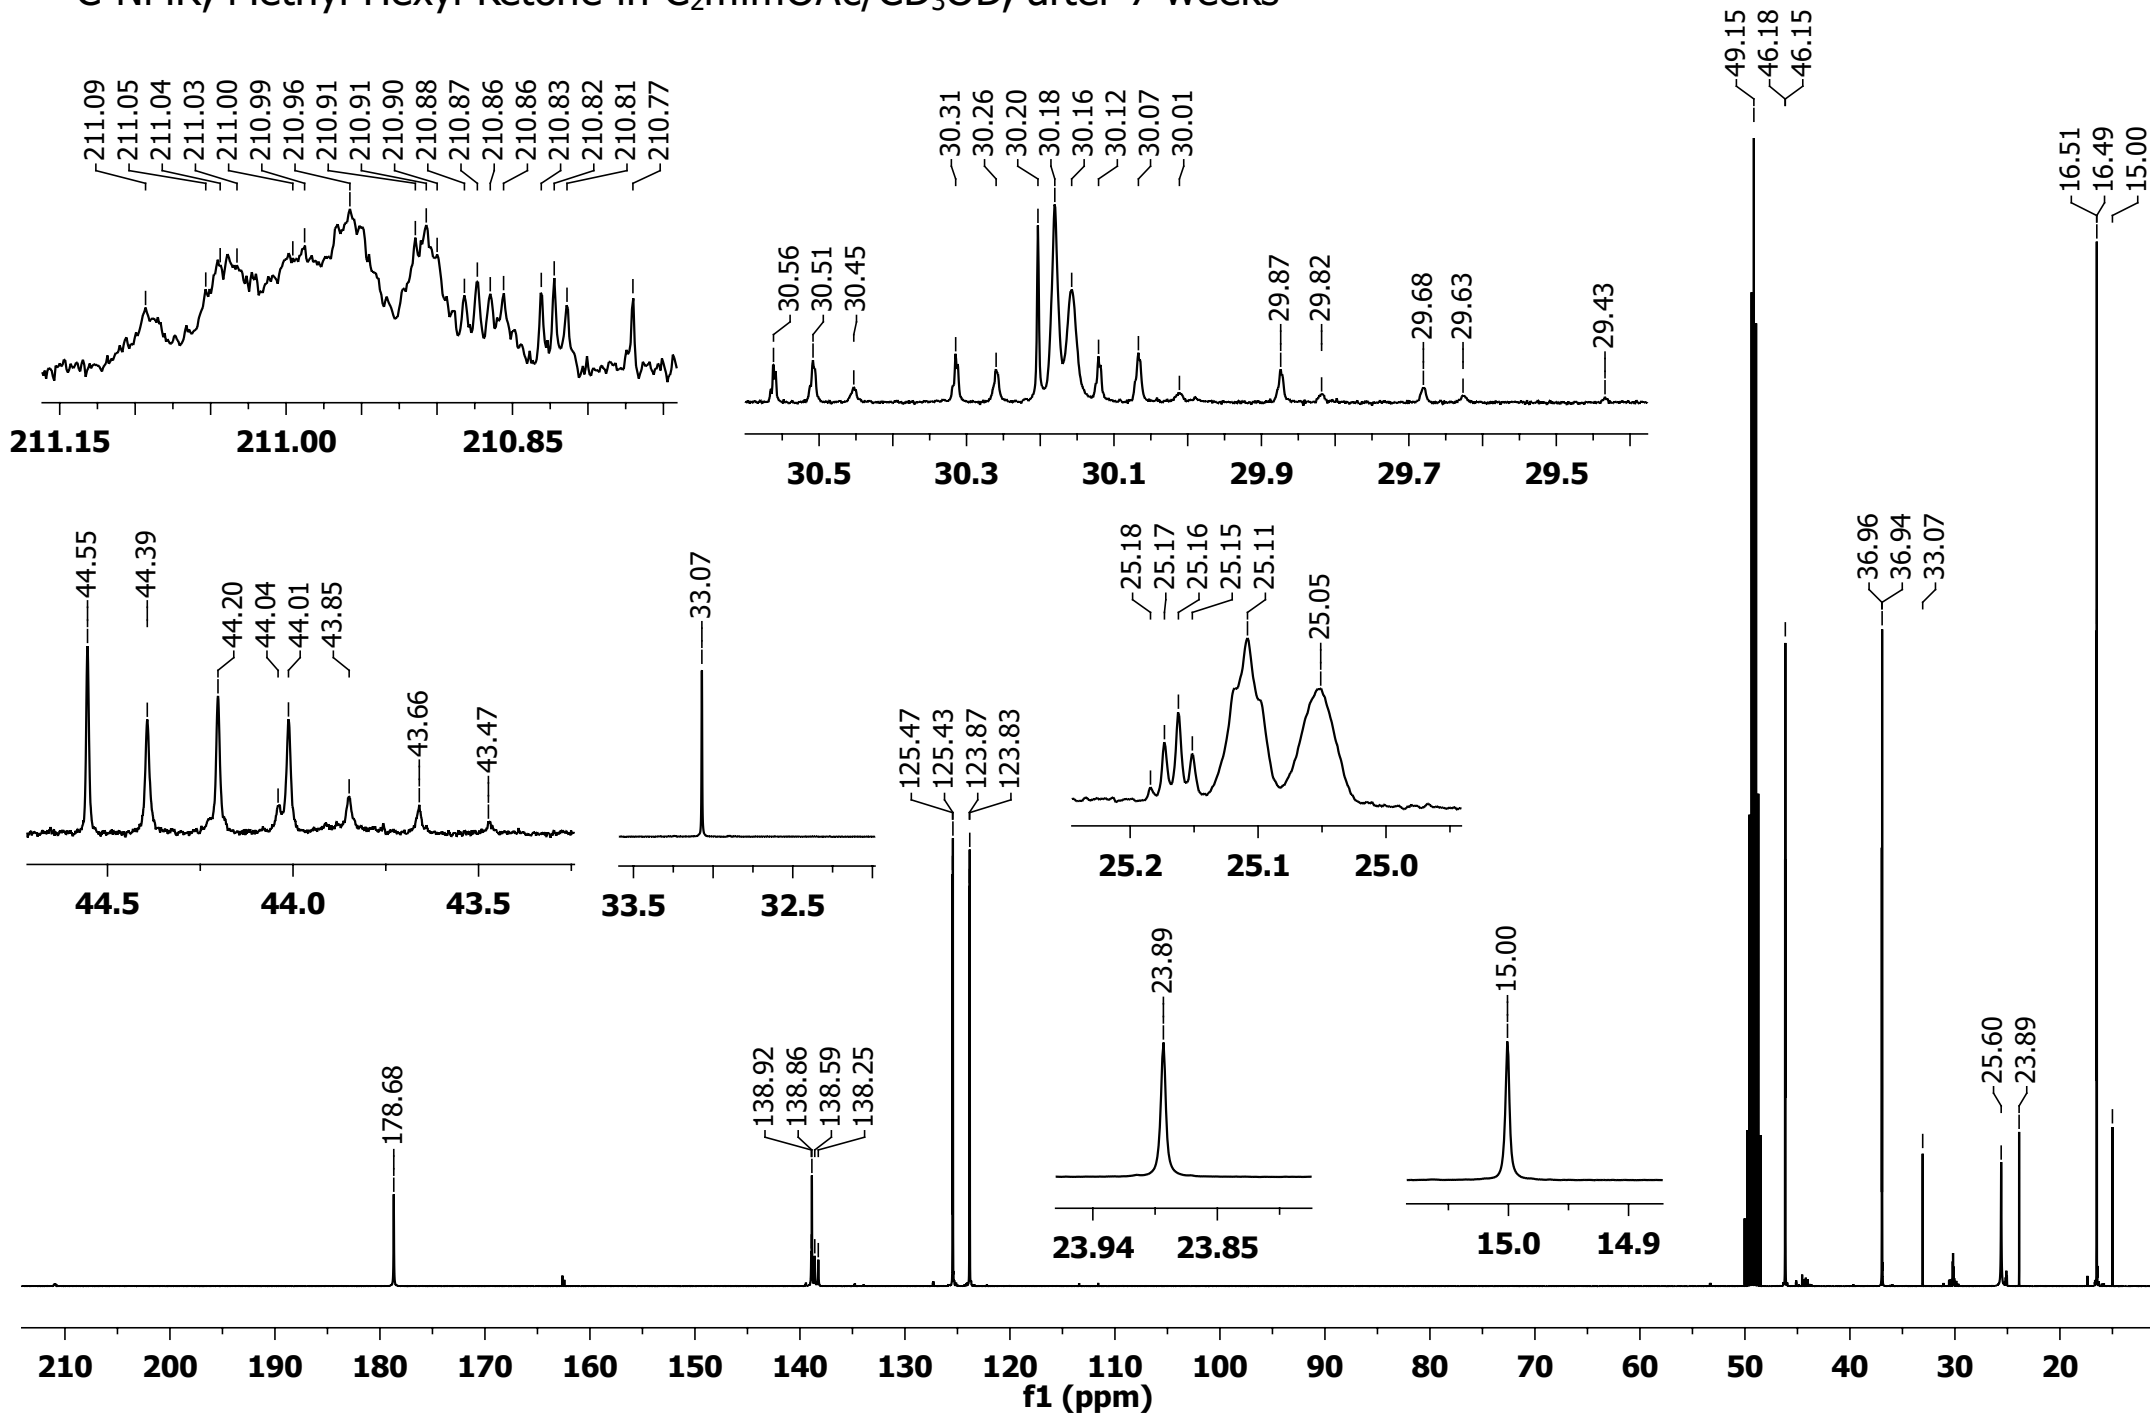

<sup>13</sup>C NMR, Methyl *Tert*-Butyl Ketone in C<sub>2</sub>mimOAc/CD<sub>3</sub>OD, after 3 weeks

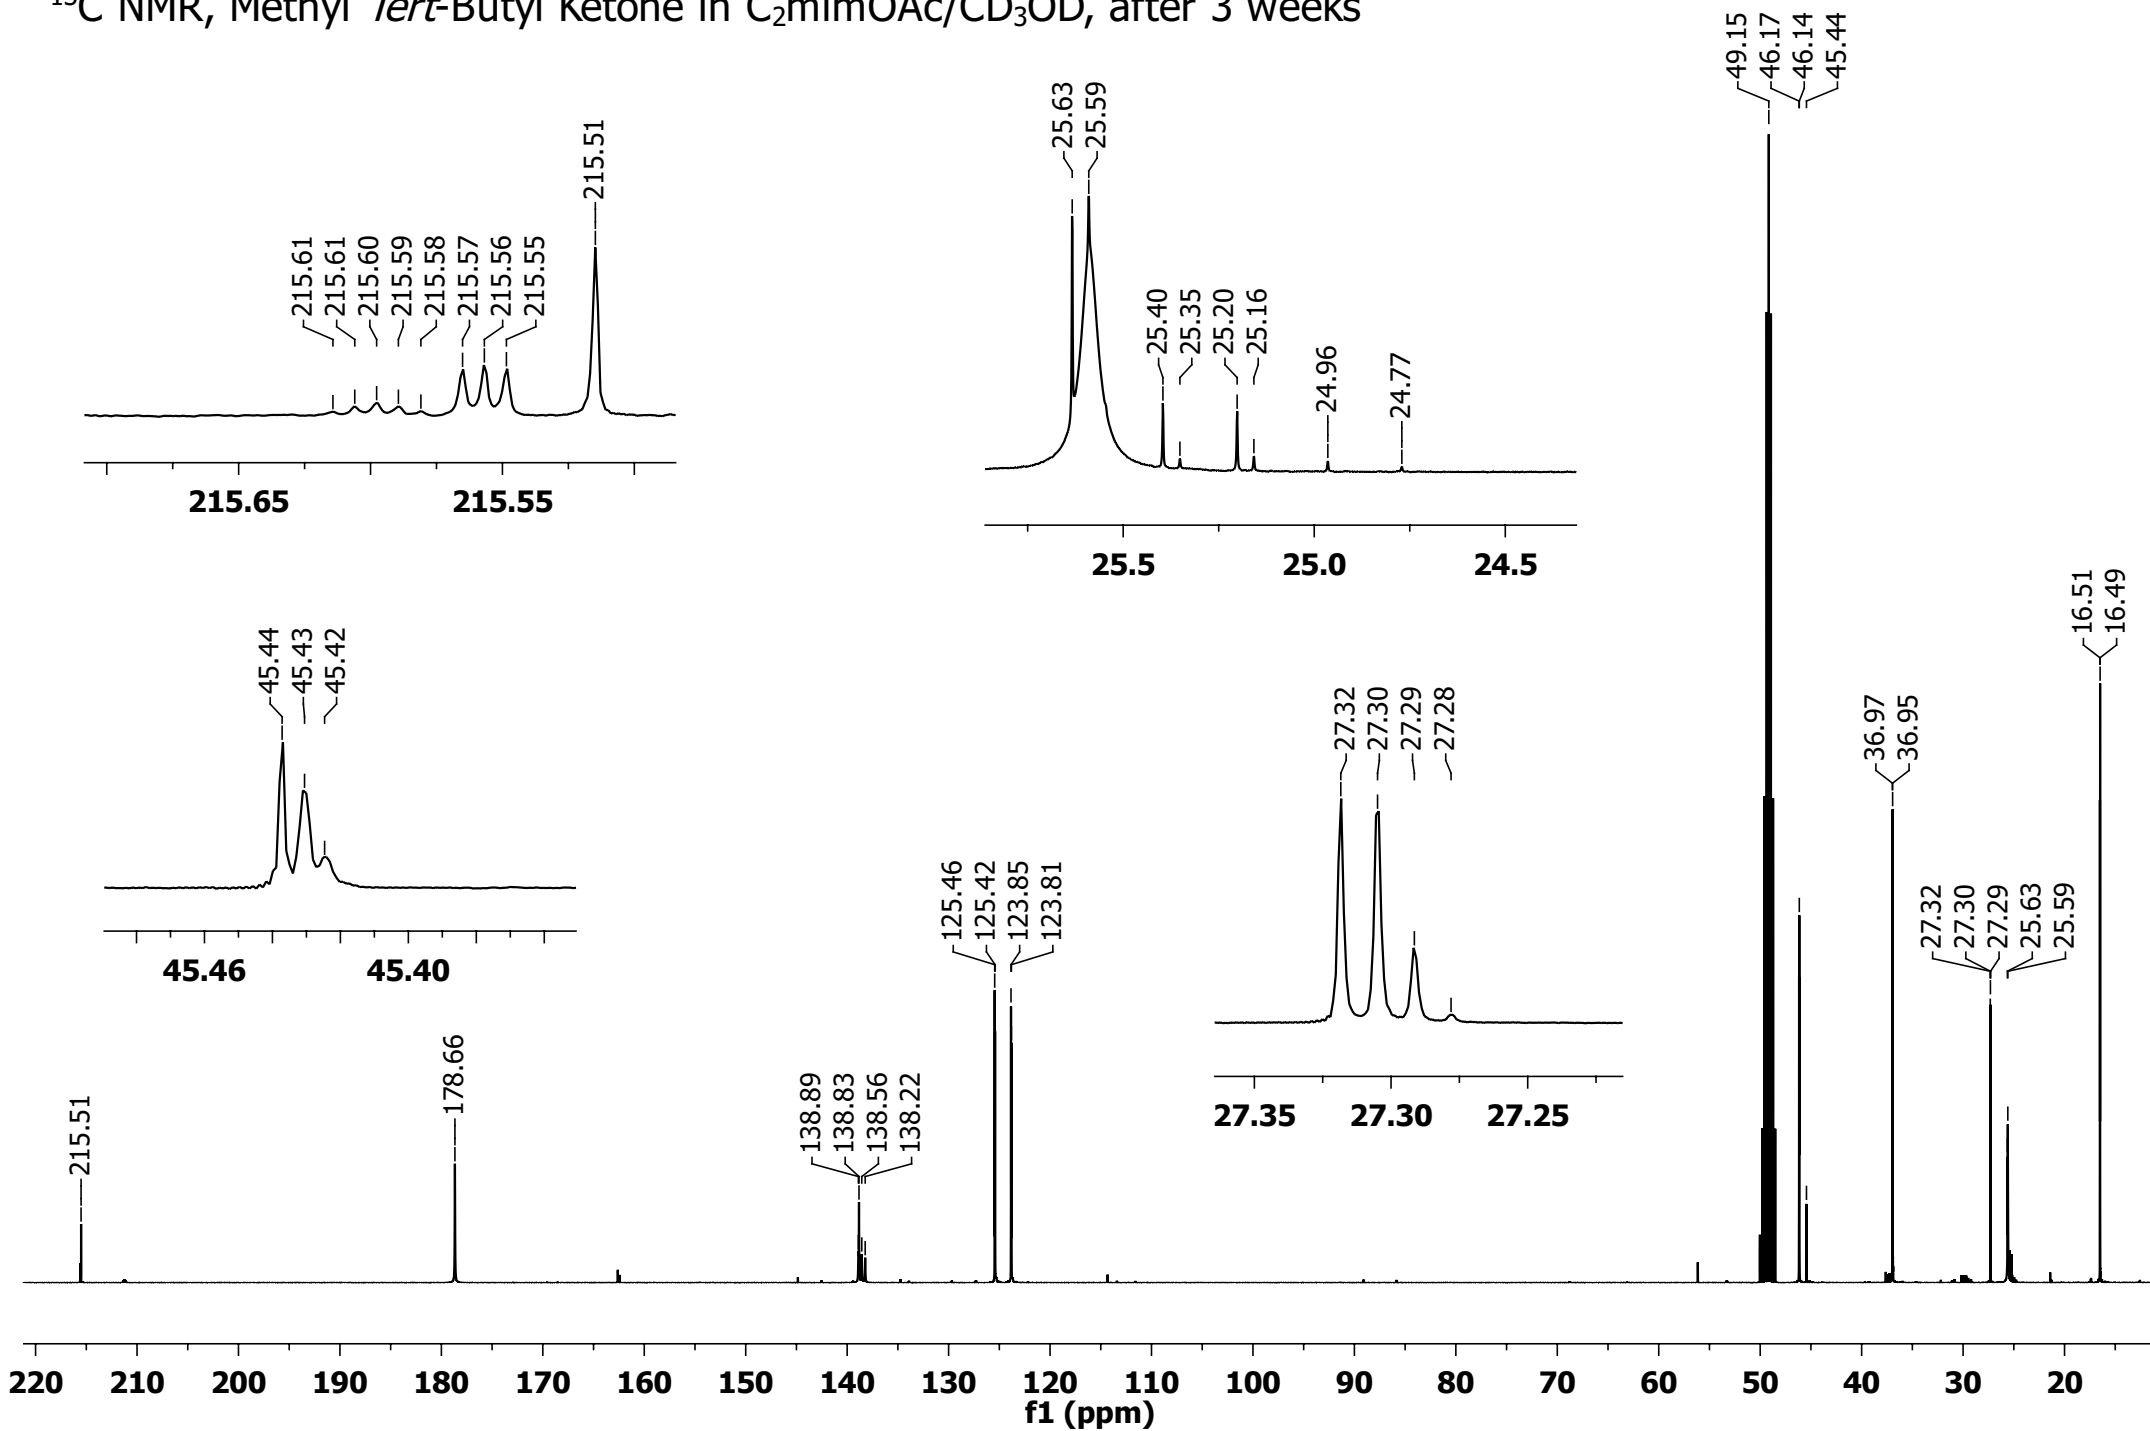

<sup>13</sup>C NMR, Acetophenone in C<sub>2</sub>mimOAc/CD<sub>3</sub>OD, after 3 weeks

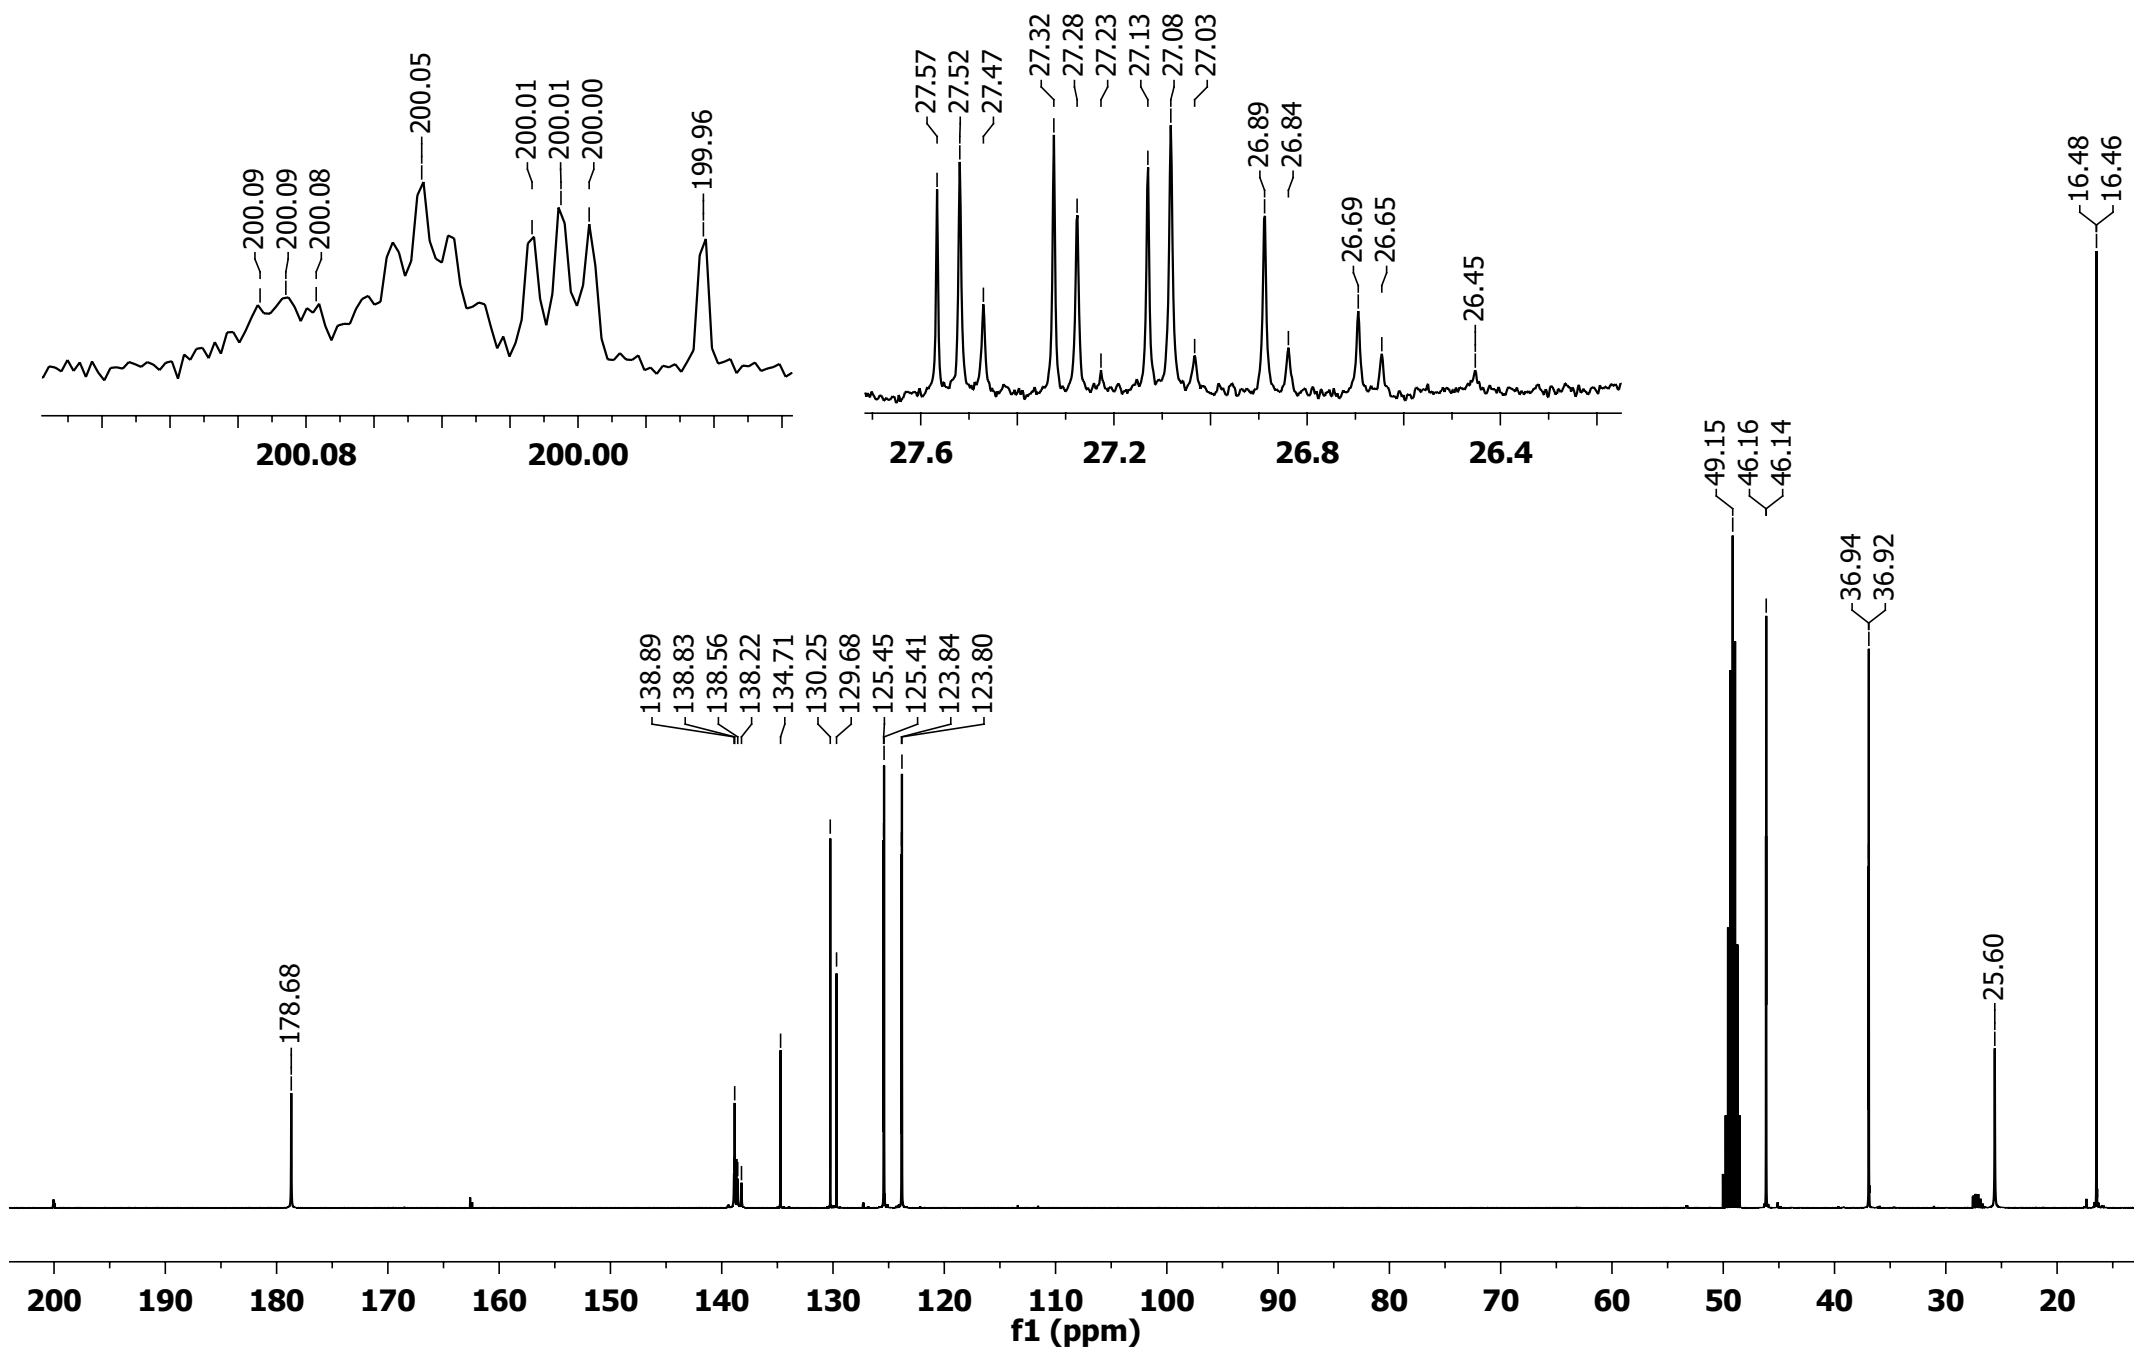

$^{13}\text{C}$  NMR, Acetone in  $\text{C}_2\text{mimOAc}/\text{CD}_3\text{OD}$ , after 5 days

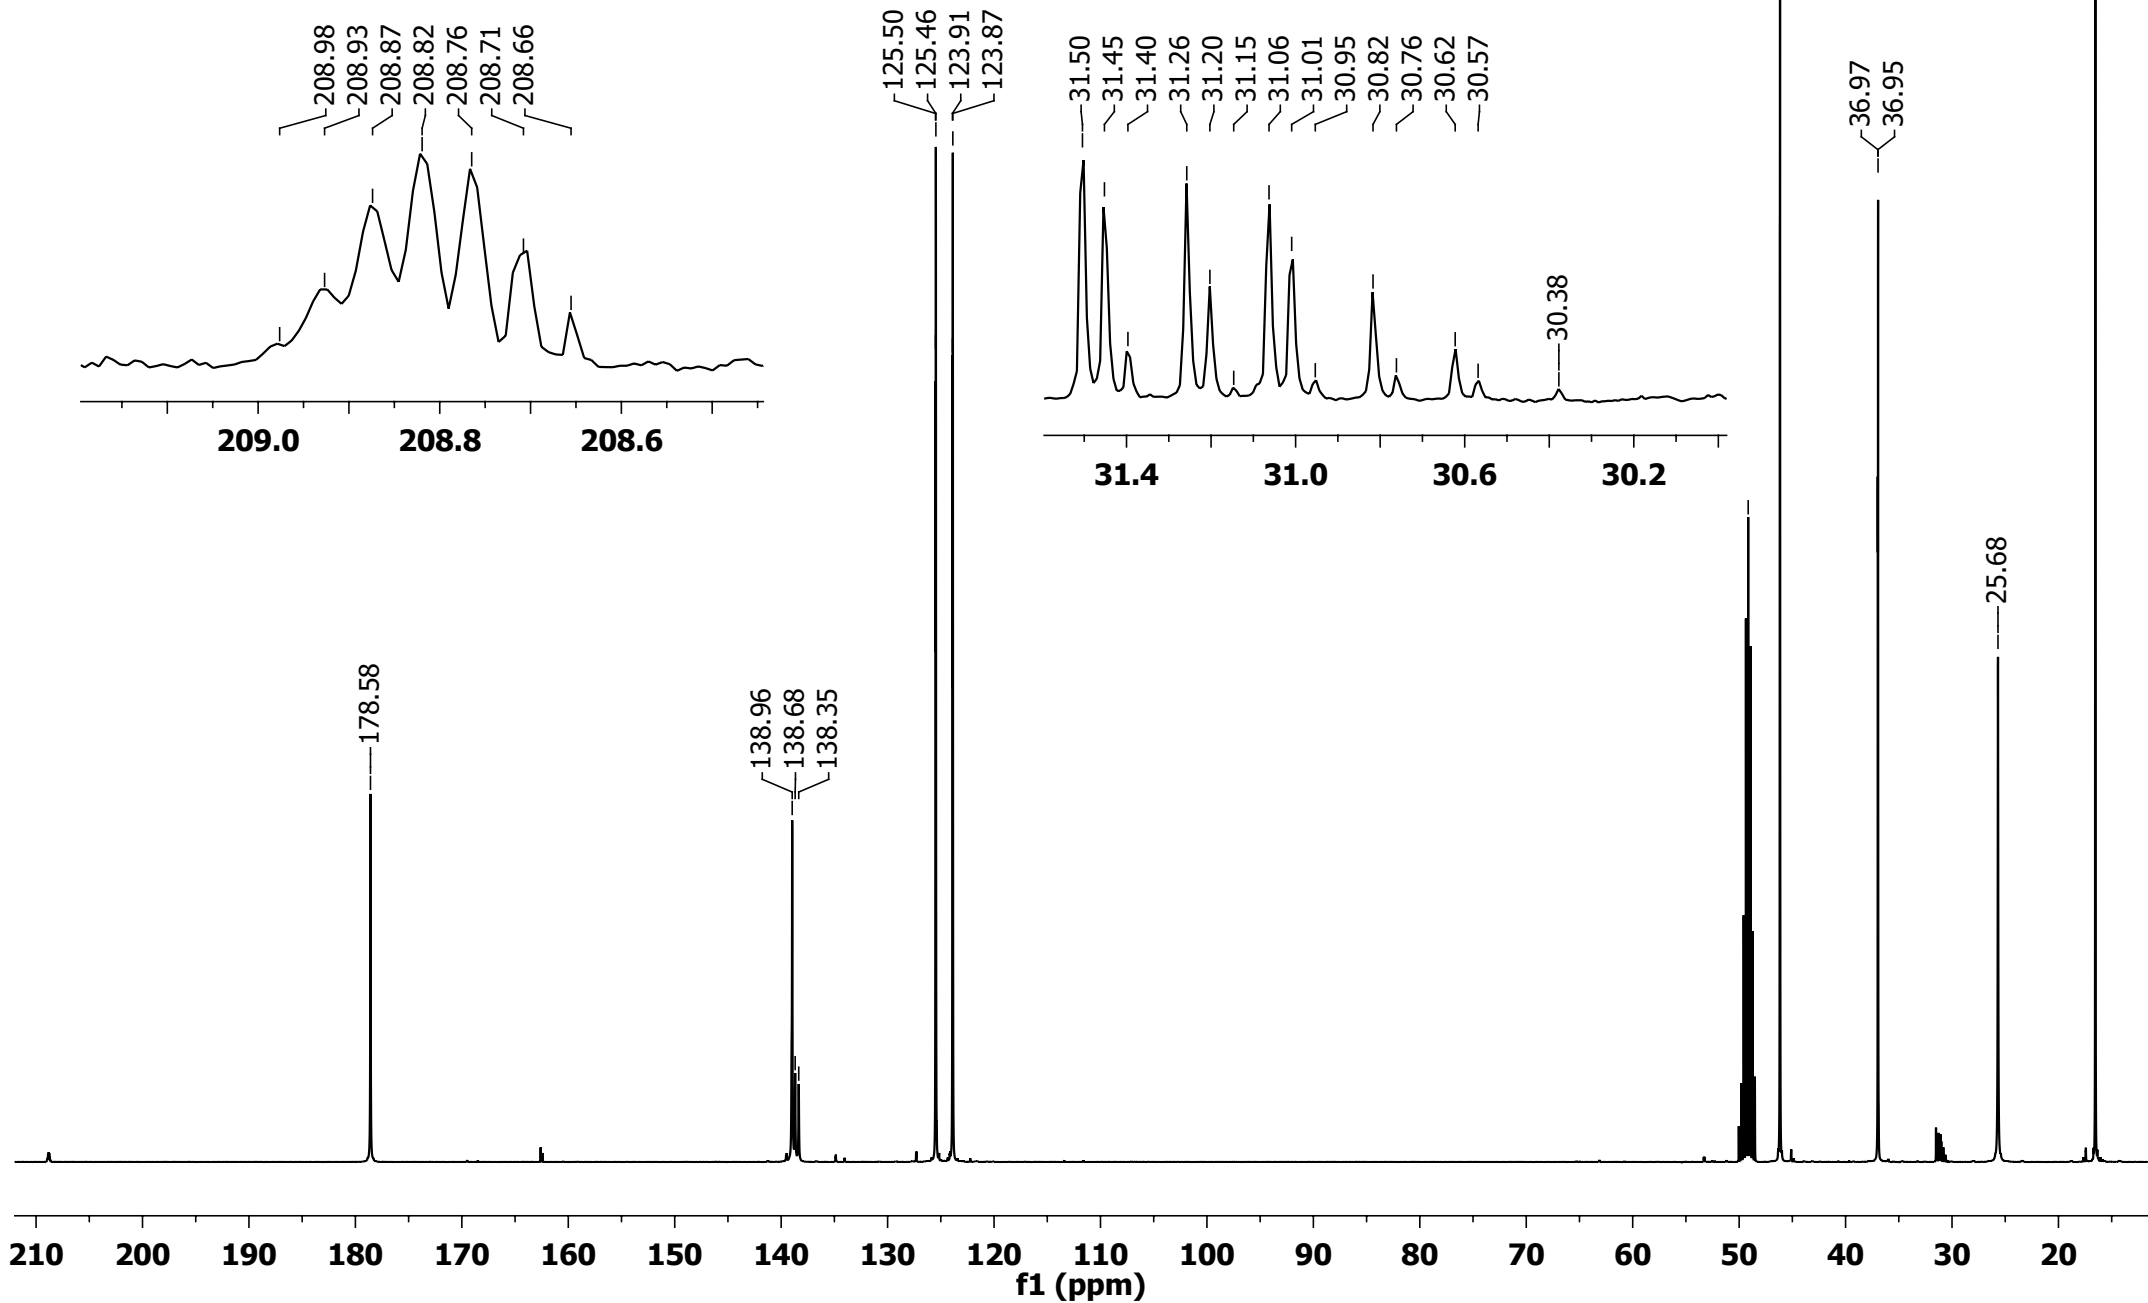

$^1\text{H}$  NMR, Methyl Isopropyl Ketone in  $\text{C}_2\text{mimOAc}/\text{CD}_3\text{OD}$ , after 7 weeks

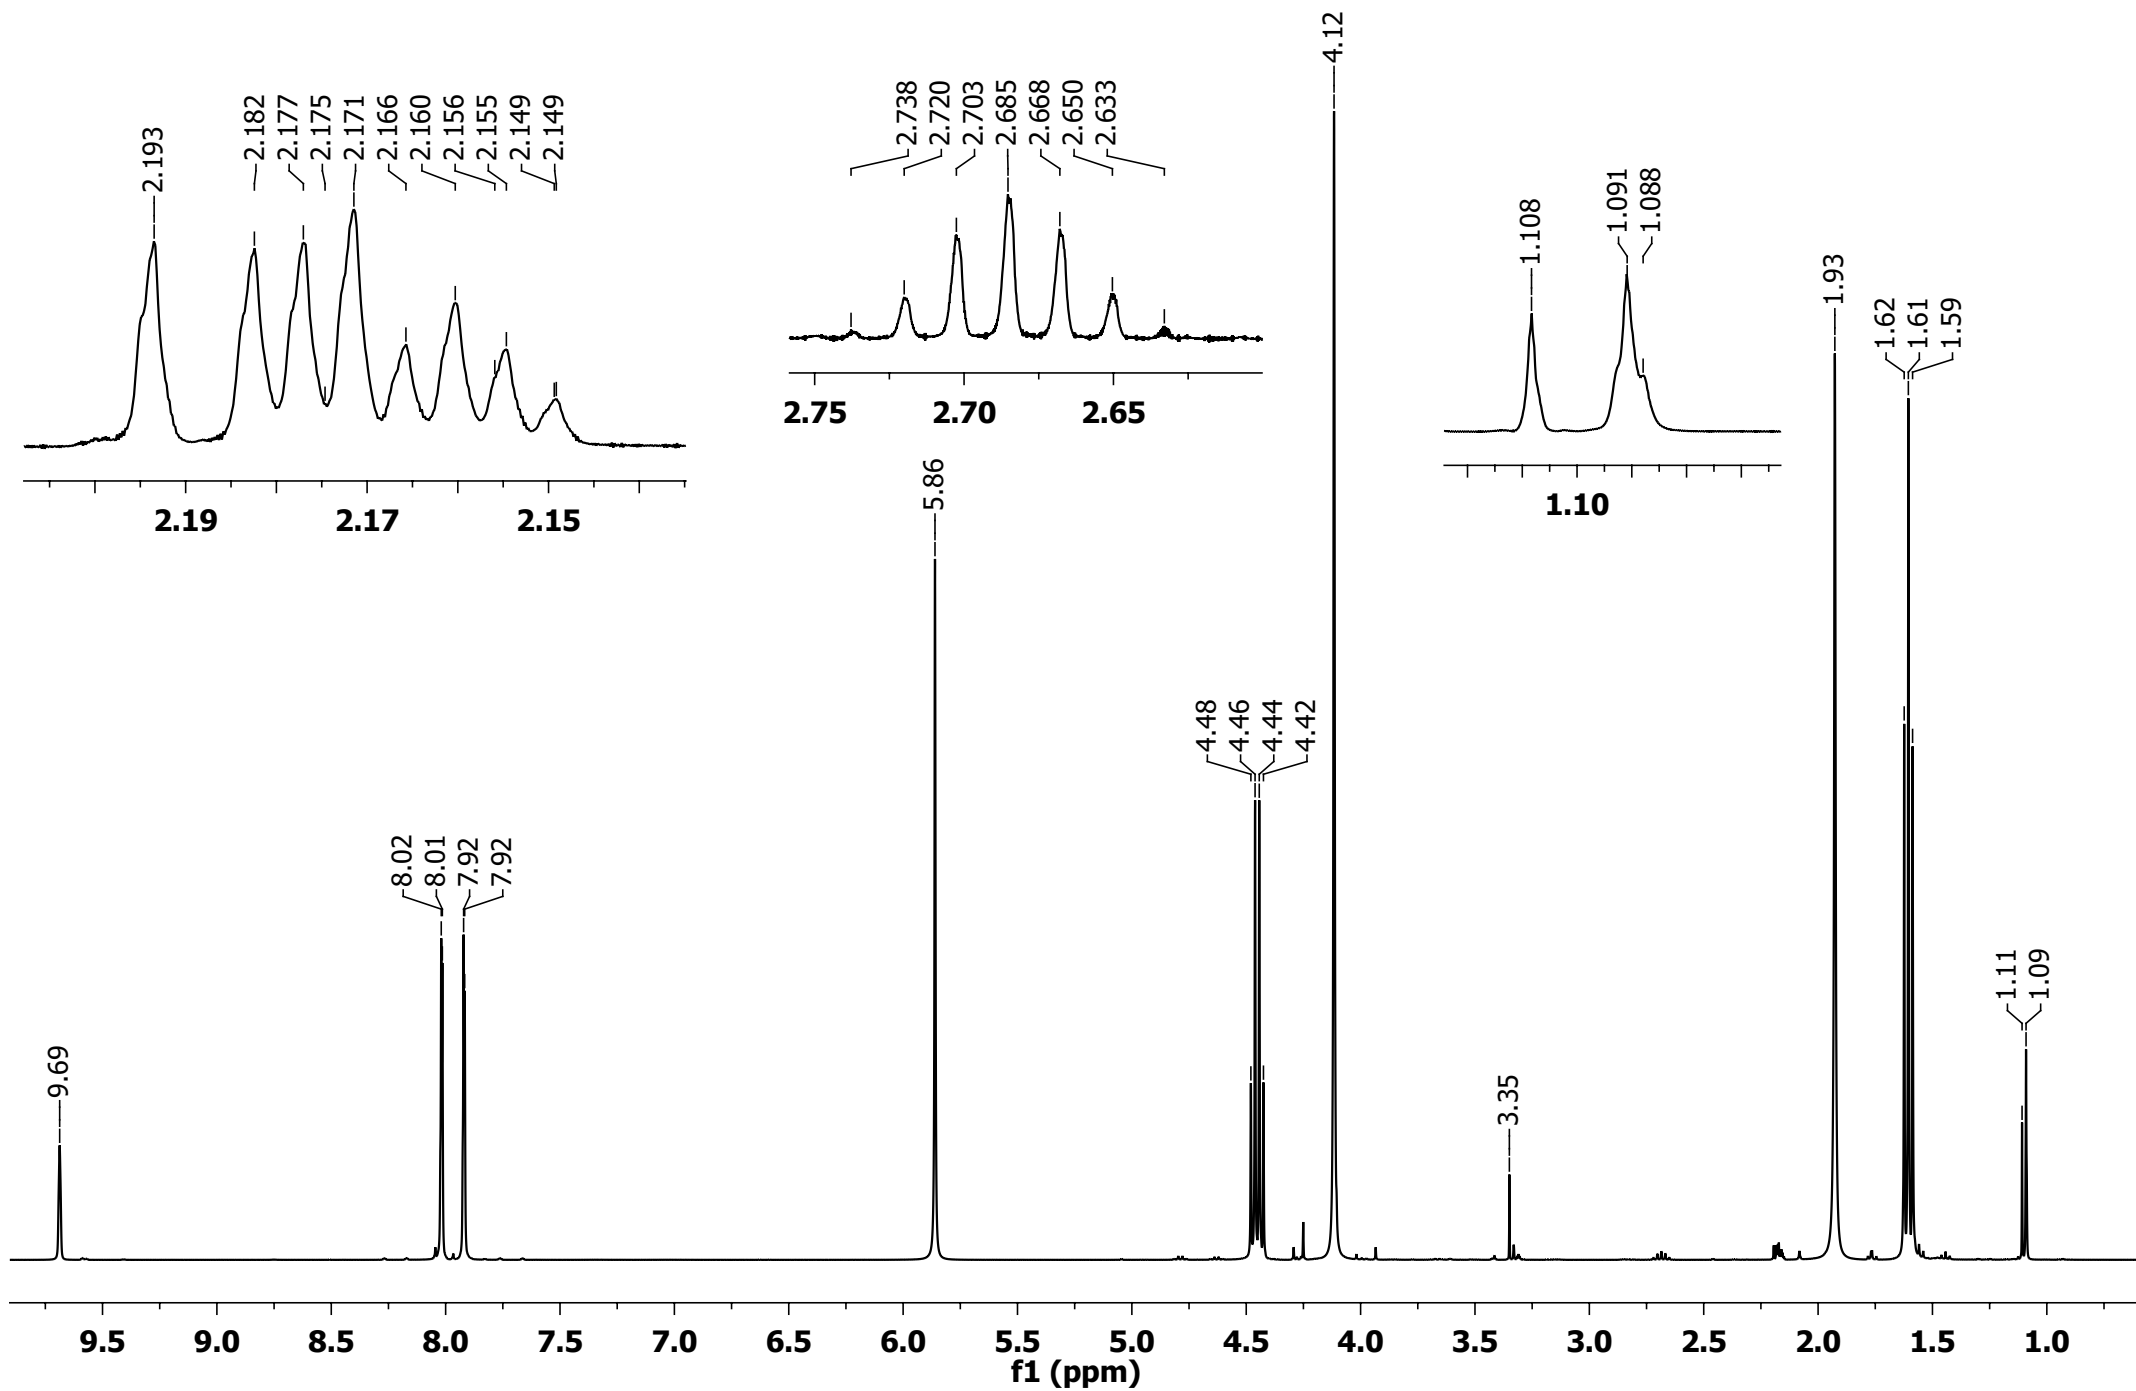



$^1\text{H}$  NMR, Methyl Ethyl Ketone in  $\text{C}_2\text{mimOAc}/\text{CD}_3\text{OD}$ , after 7 weeks

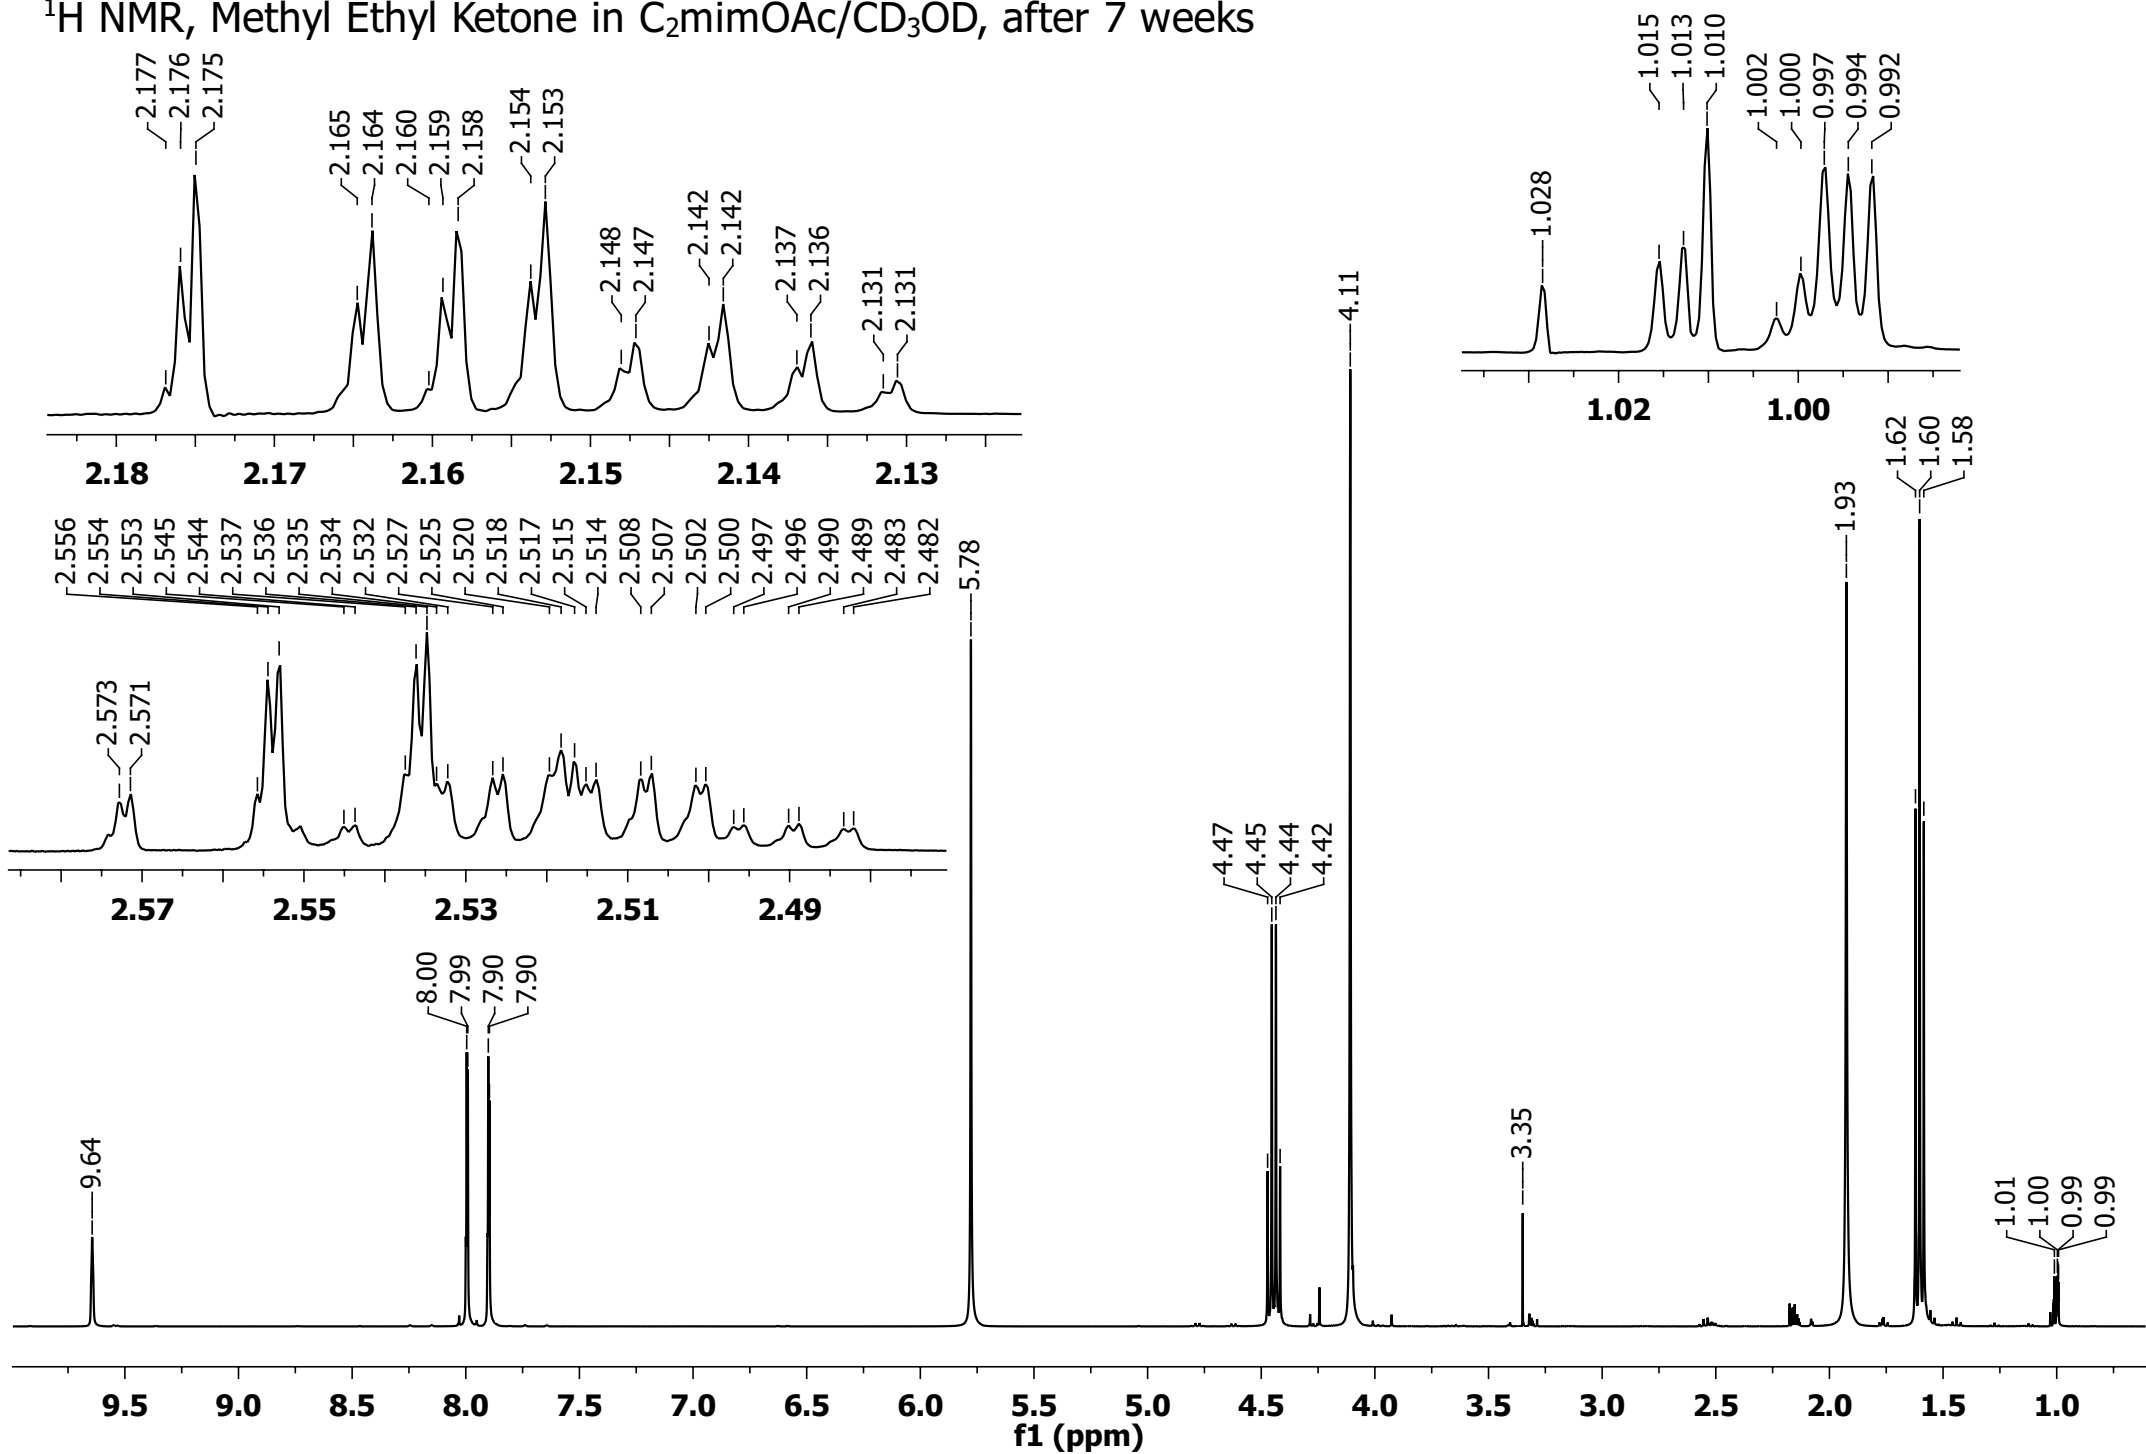

$^1\text{H}$  NMR, Methyl Propyl Ketone in  $\text{C}_2\text{mimOAc}/\text{CD}_3\text{OD}$ , after 7 weeks

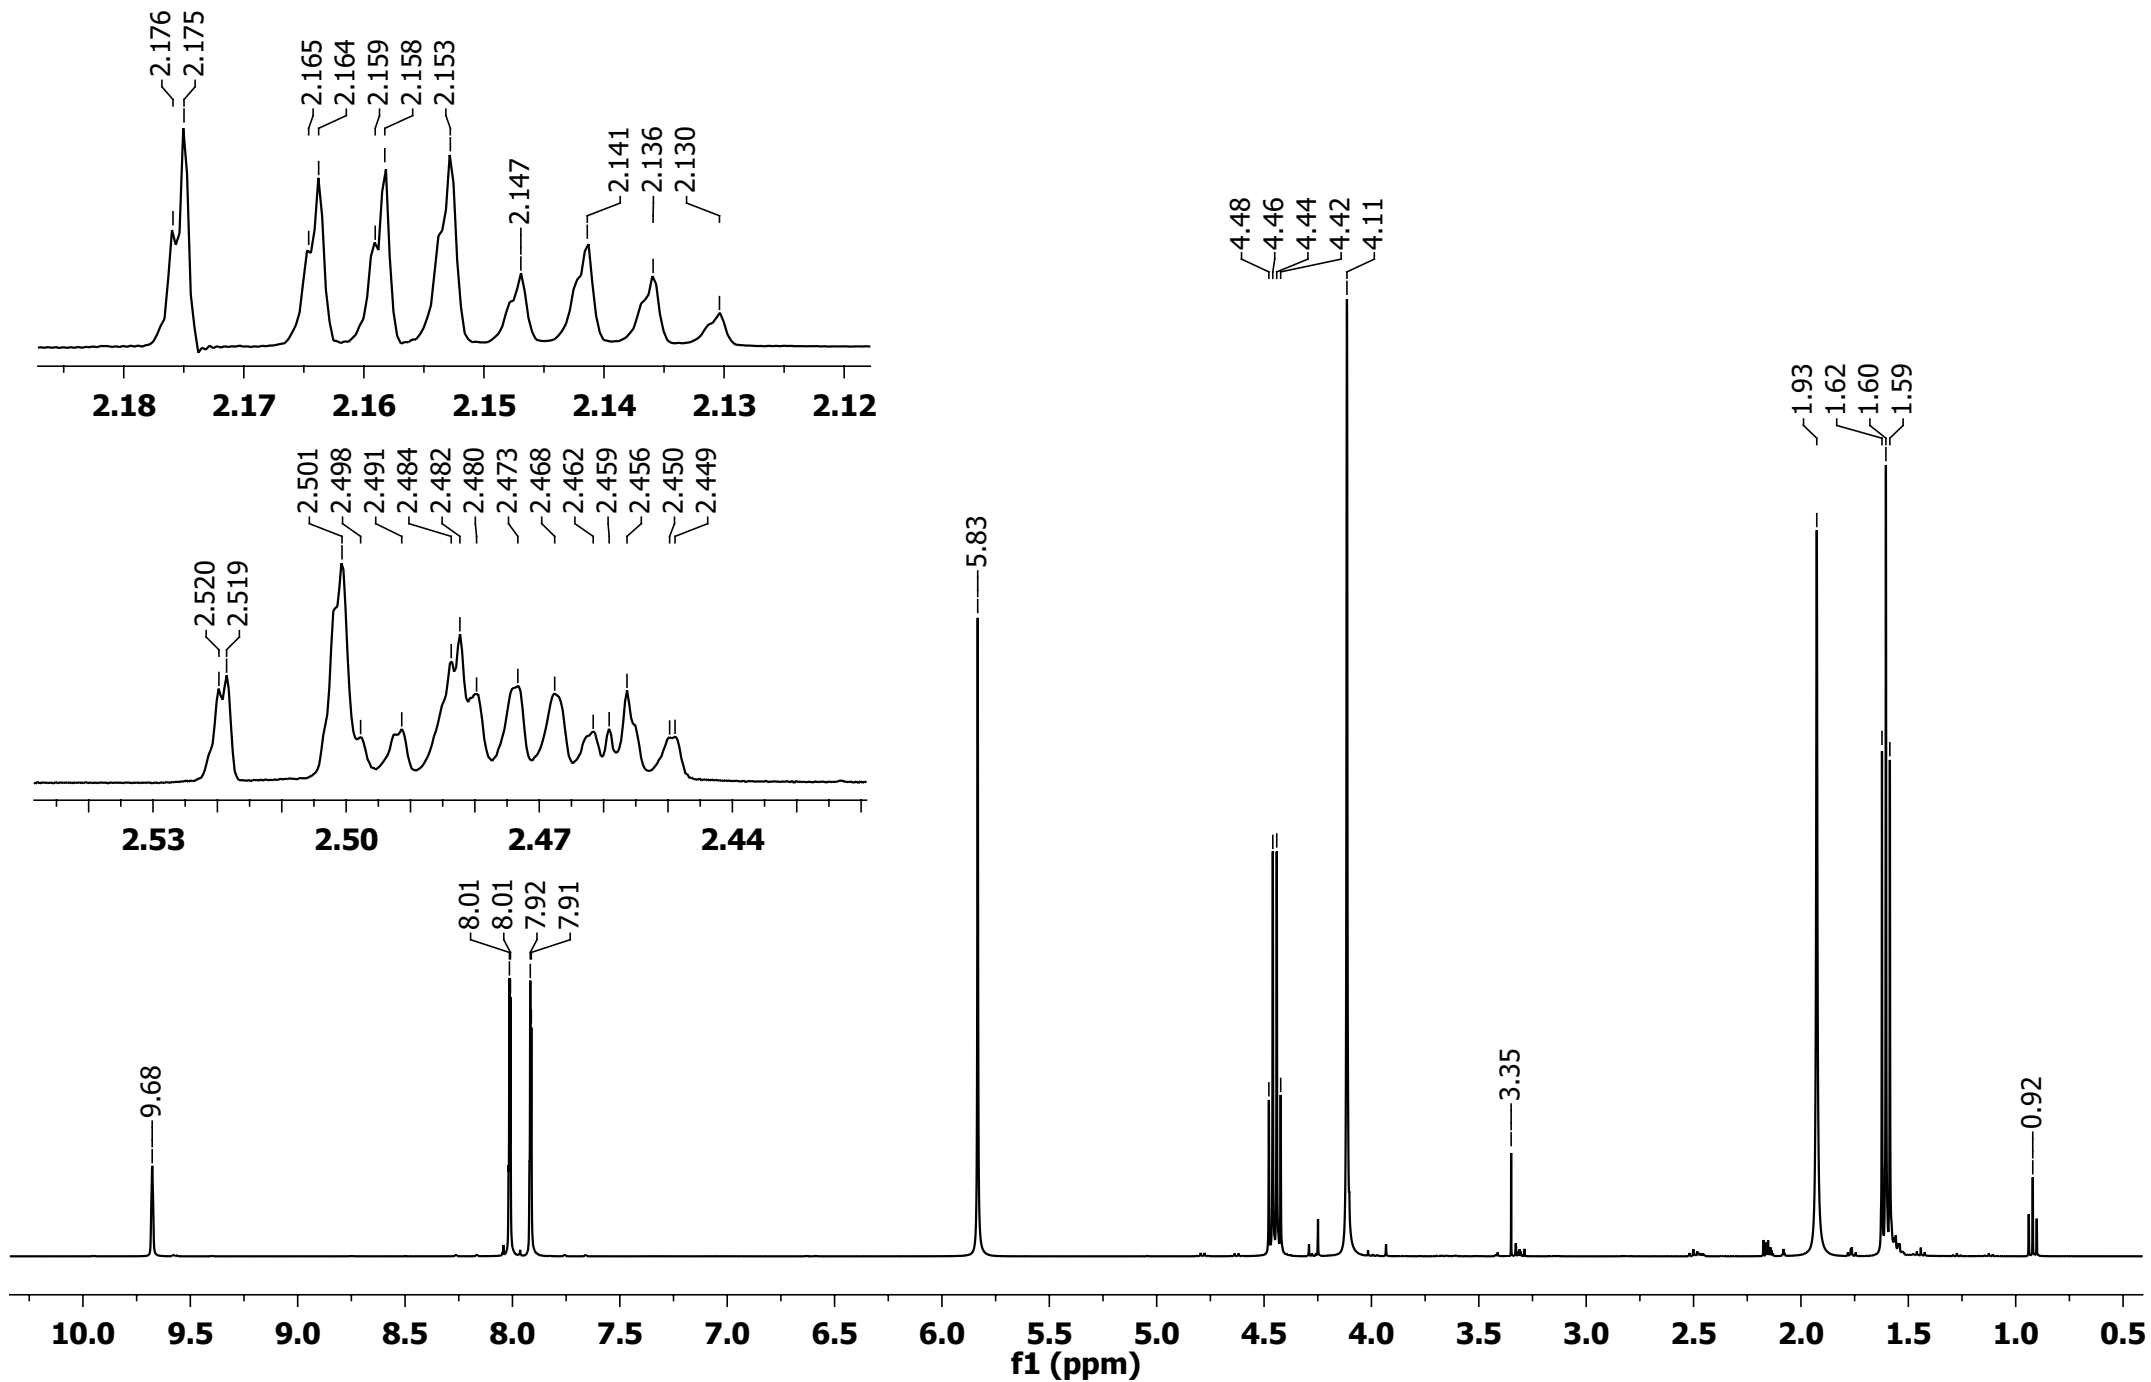

$^1\text{H}$  NMR, Methyl Butyl Ketone in  $\text{C}_2\text{mimOAc}/\text{CD}_3\text{OD}$ , after 7 weeks

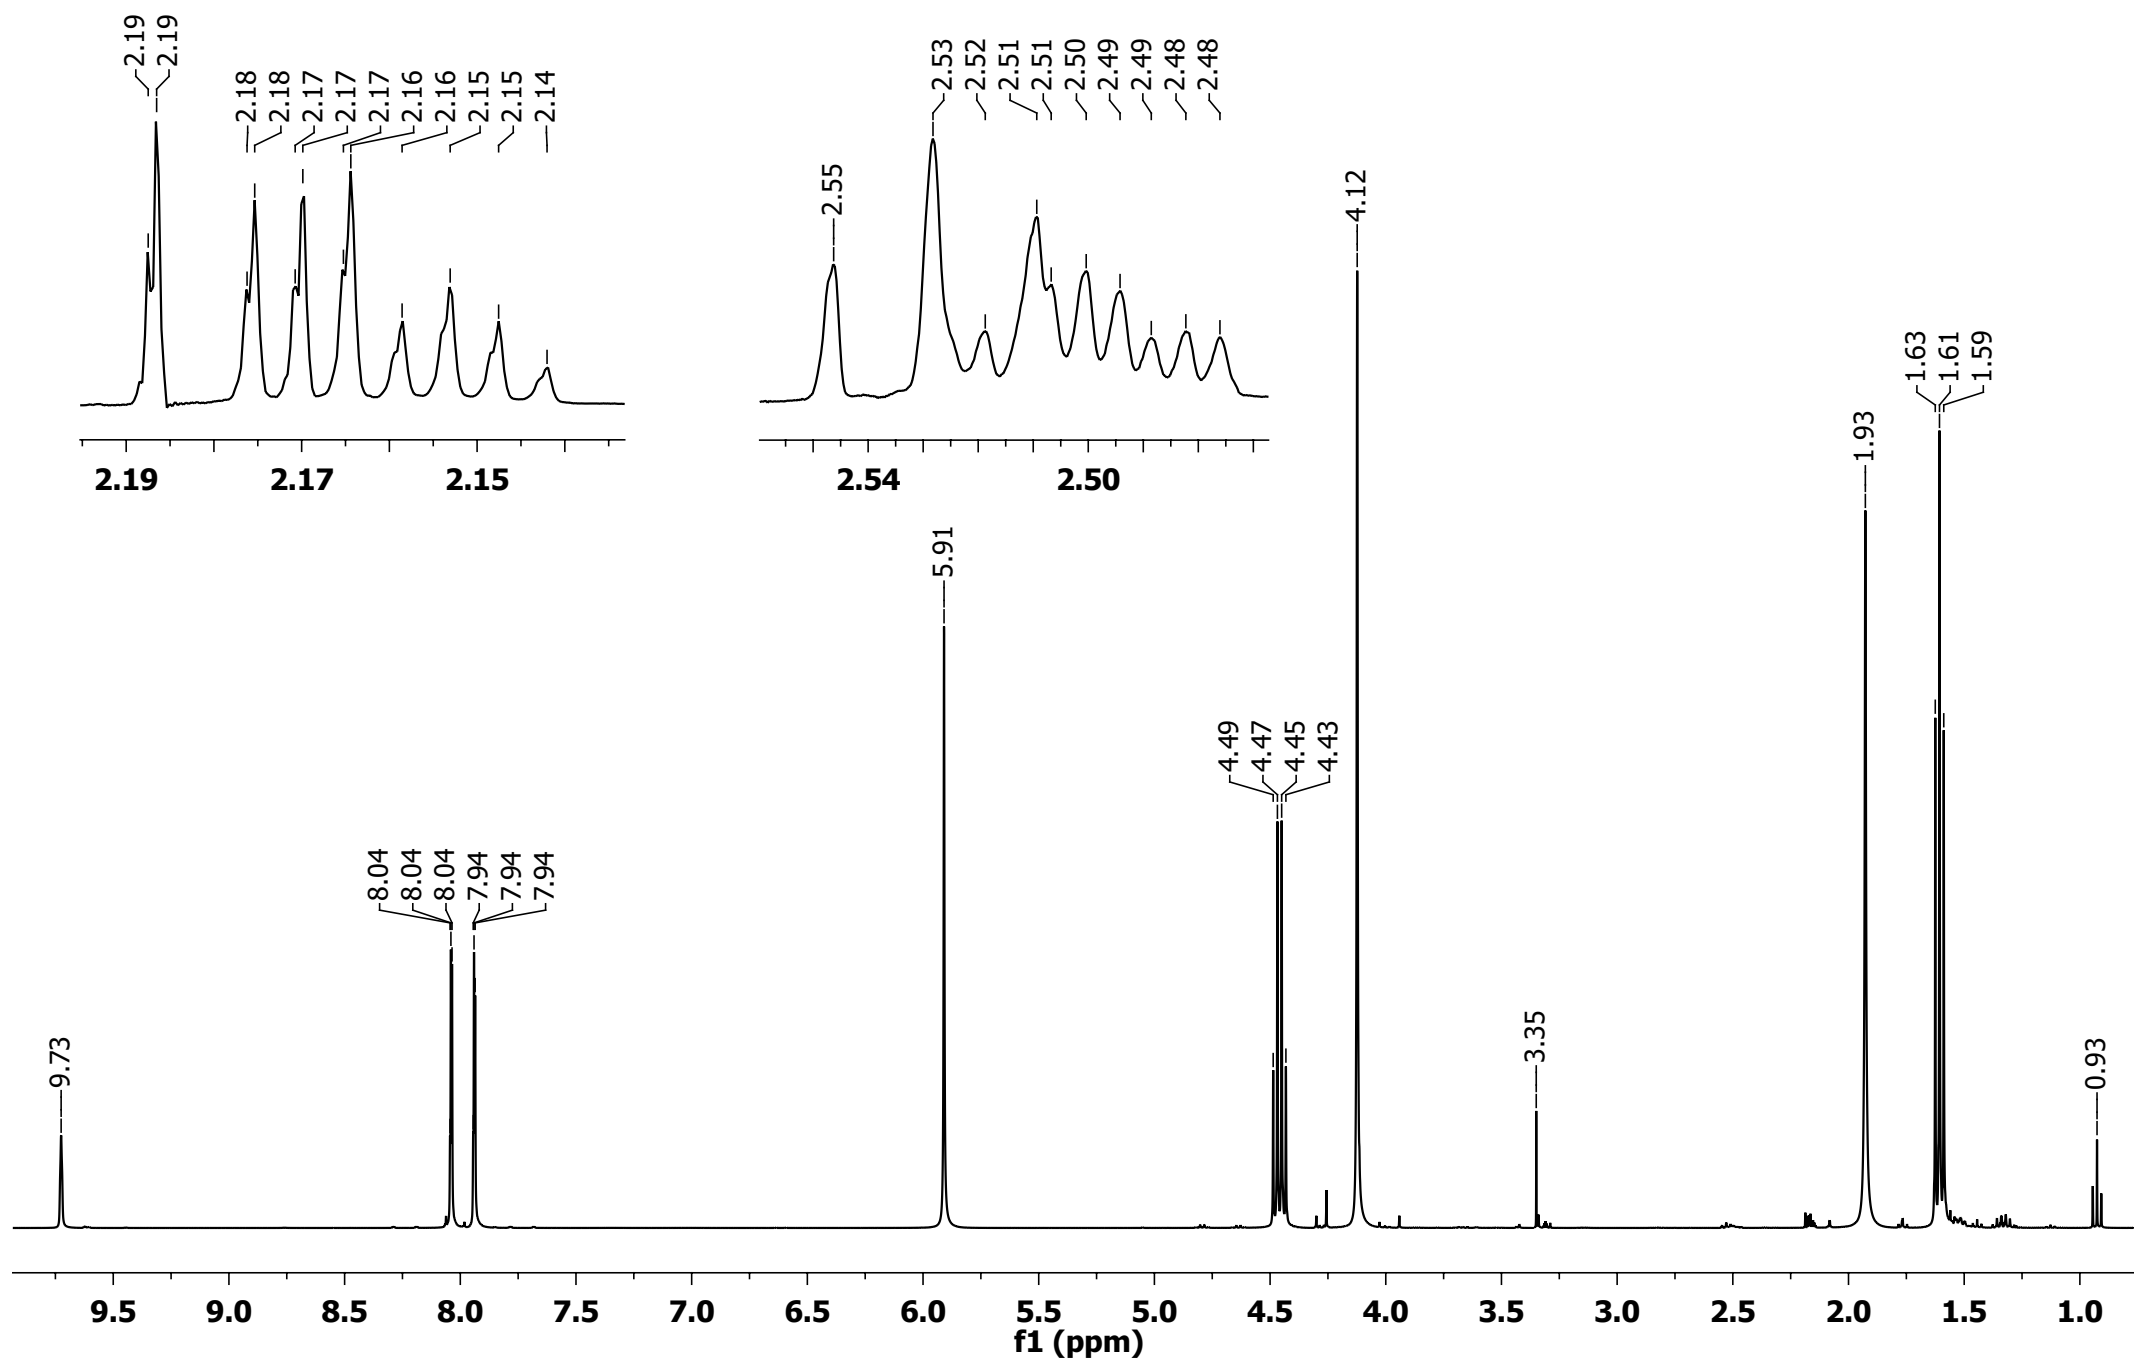

$^1\text{H}$  NMR, Methyl Hexyl Ketone in  $\text{C}_2\text{mimOAc}/\text{CD}_3\text{OD}$ , after 7 weeks

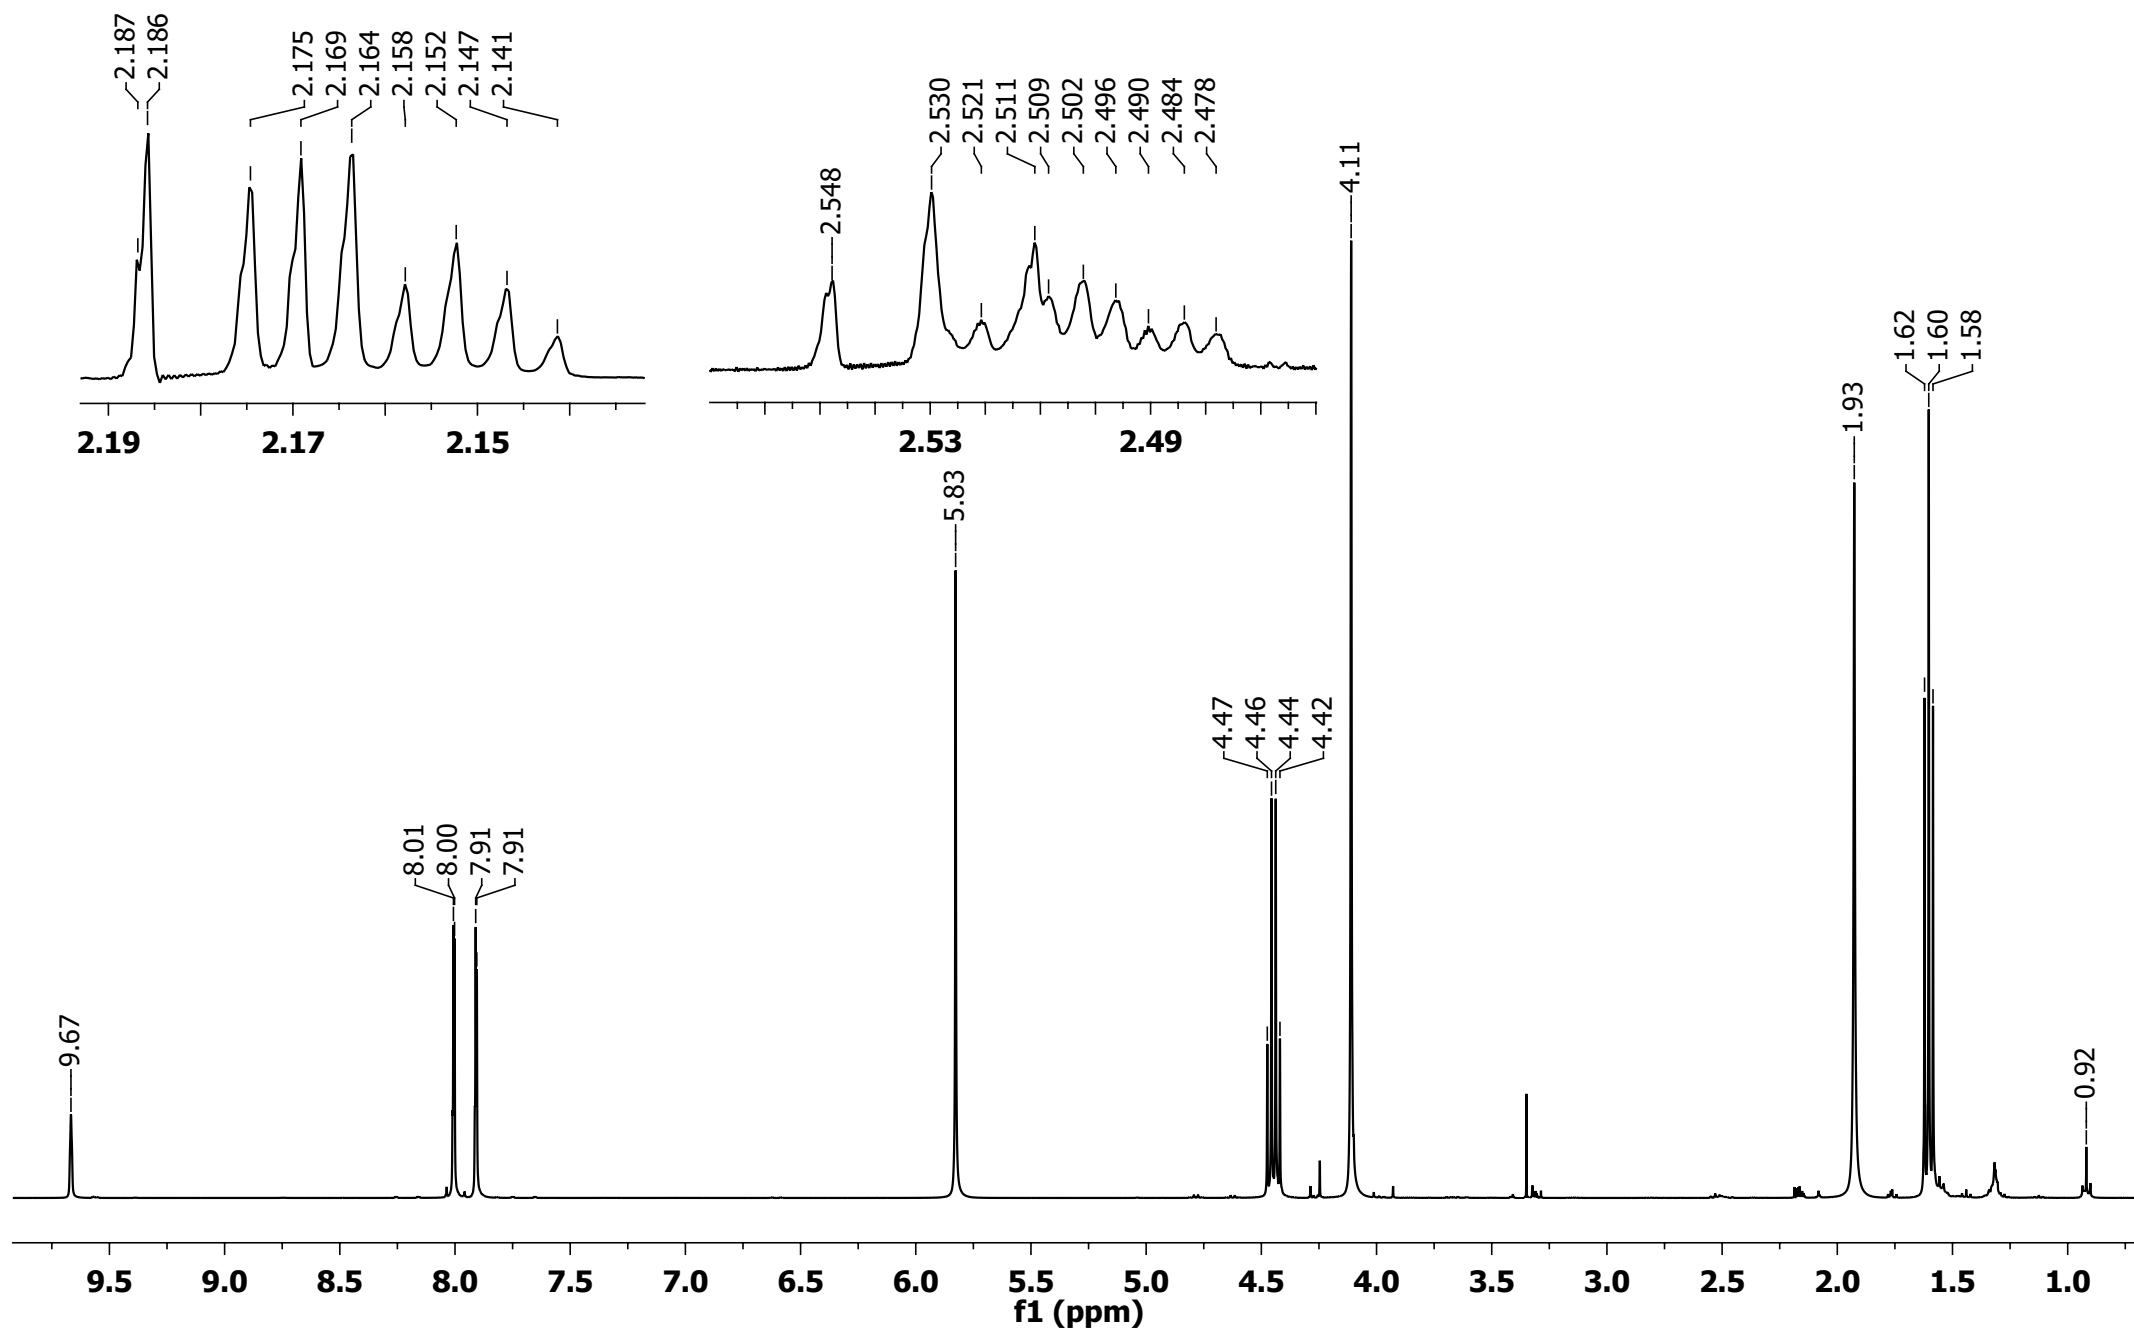

Supplement: d1ra07232c1.pdf [file d1ra07232c1.pdf]
